# Supplementary material for: Elevated Anthropogenic Contributions to Trace Elements in Marine Aerosols Compared to Coastal Qingdao in Eastern China
Source: Copernicus journal article supplement (doi:10.5194/egusphere-2025-4005), 2025-09-09
Supplement: Supplementary file 13 [file egusphere-2025-4005-supplement.zip]

## Supplemental Figures

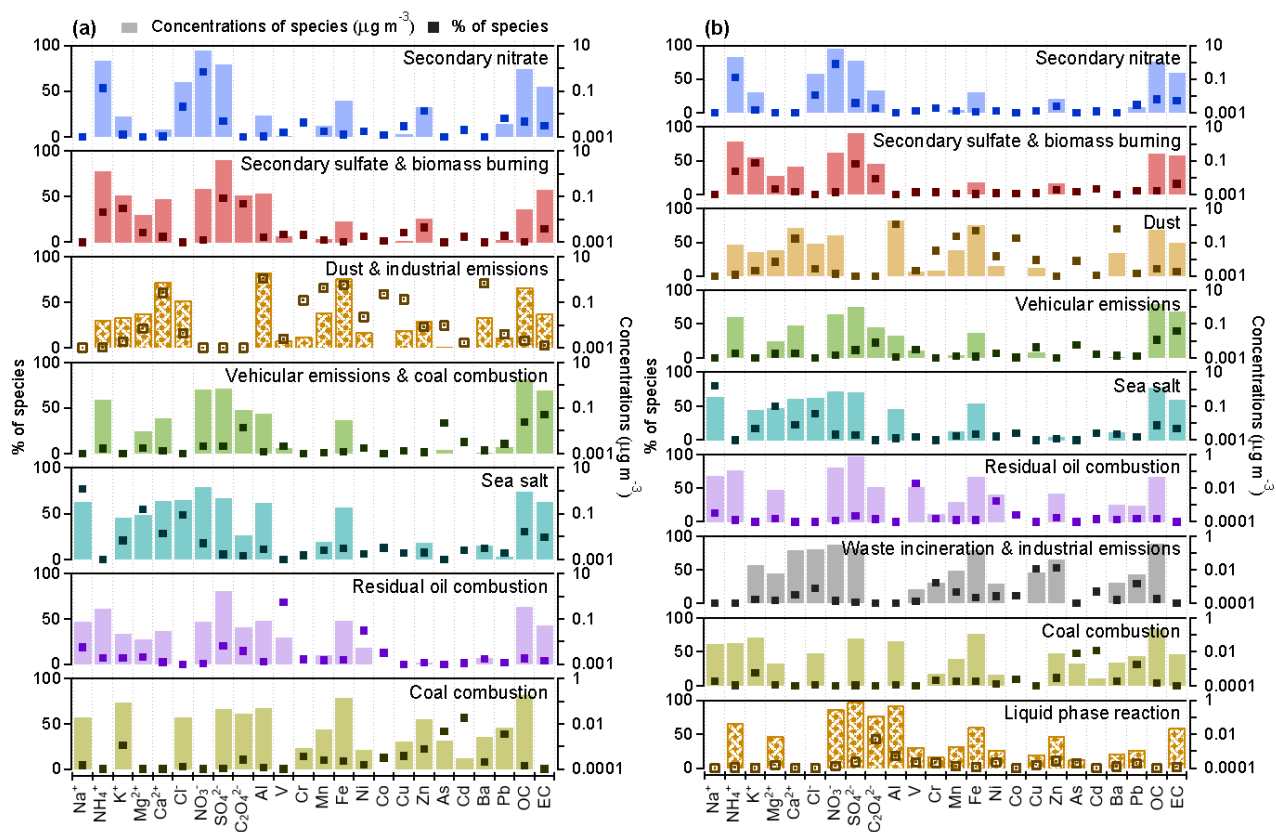

**Figure S1:** PMF resolved factor profiles (dark points represent the percentages and light rectangles represent the concentrations of each species in each factor) of (a) 7-factor and (b) 9-factor solution.

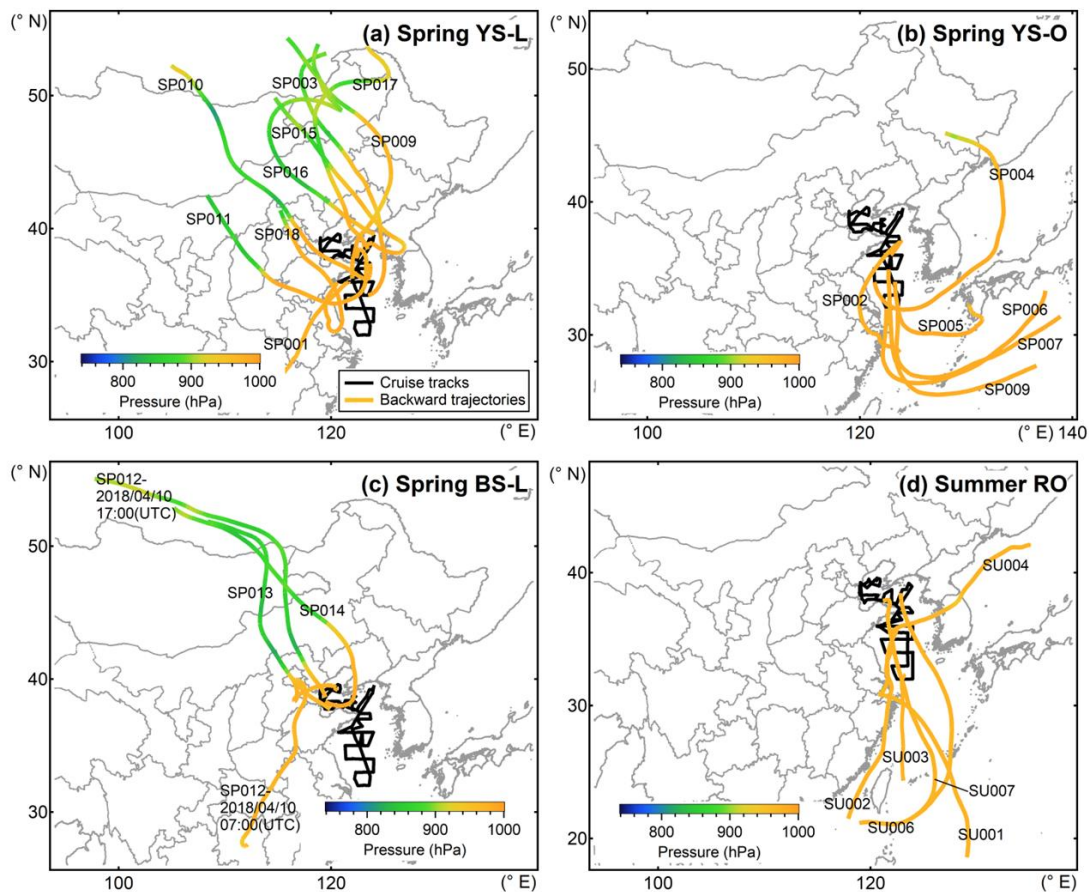

**Figure S2.** Averaged 72 h backward trajectories arriving at the BS and YS in (a) (b) (c) spring and (d) summer of each sample. The black solid line indicates the cruise tracks. “YS-O” means “YS-ocean”.

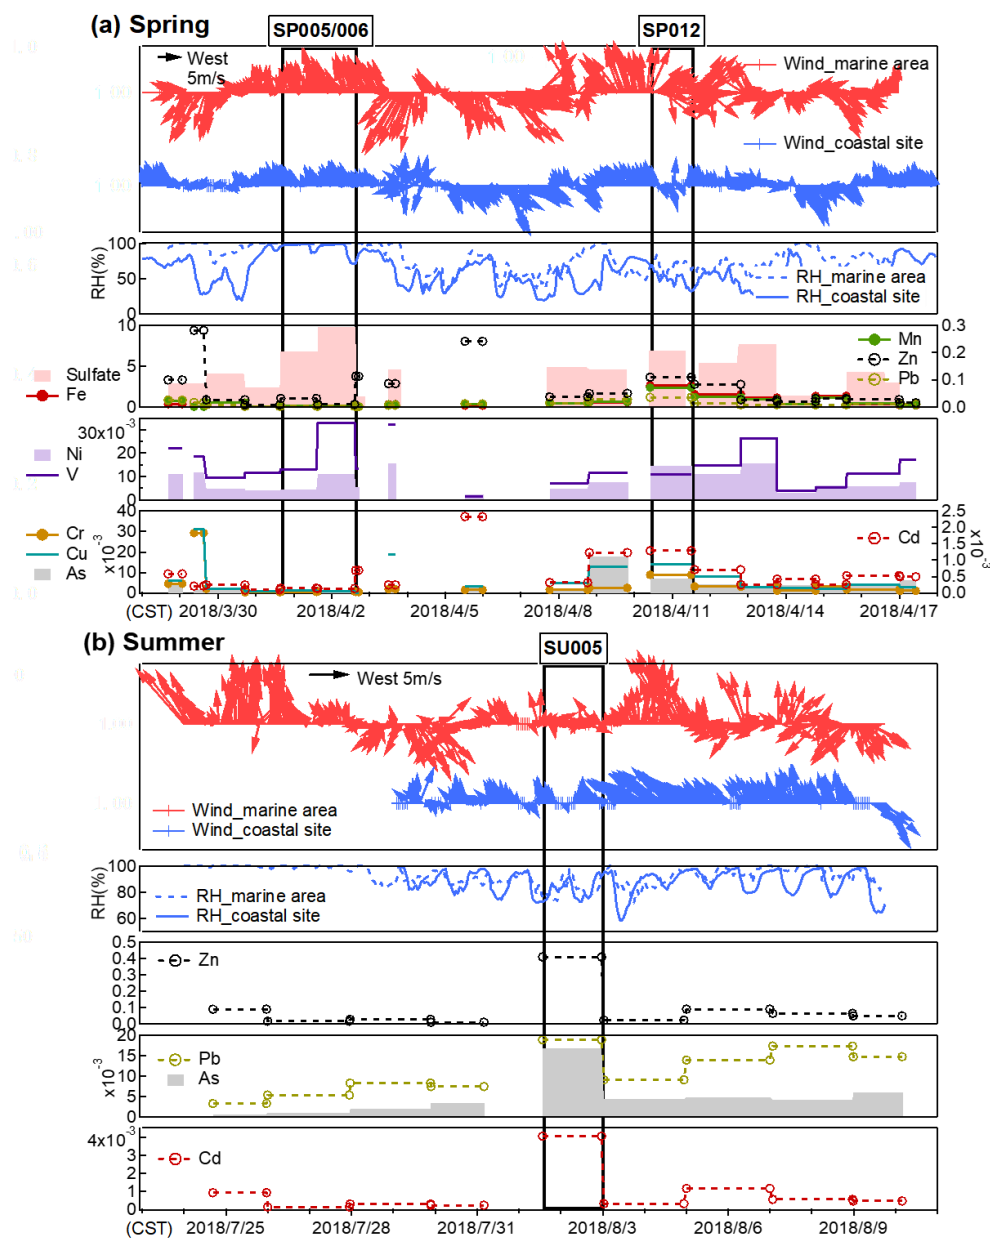

**Figure S3.** Temporal variations of meteorological parameters and selected species concentrations ( $\mu\text{g}/\text{m}^3$ ) in (a) spring and (b) summer. “SP005/006” and “SP012” marked in (a) show the information about the sampling period for sample SP005, SP006, and SP012, respectively. “SU005” marked in (b) shows the sampling period for sample SU005.

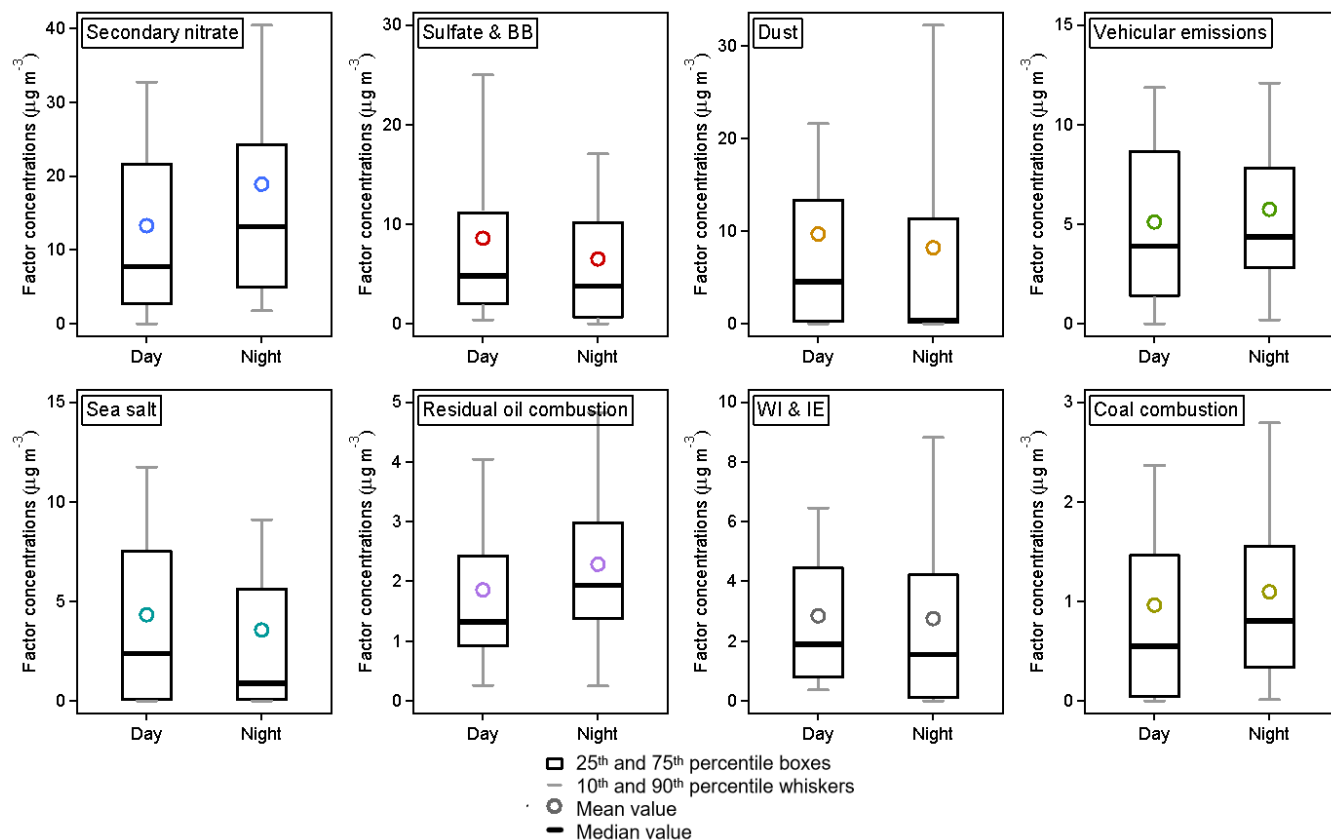

**Figure S4.** Diurnal variations of individual factor contributions from PMF results of spring in Qingdao. (29 daytime and 26 nighttime samples were collected, respectively. 25<sup>th</sup> and 75<sup>th</sup> percentile boxes, 10<sup>th</sup> and 90<sup>th</sup> percentile whiskers; the solid black line is the median value, and the circle is the mean value.) Sulfate & BB represents sulfate & biomass burning. WI & IE represents waste incineration & industrial emissions.

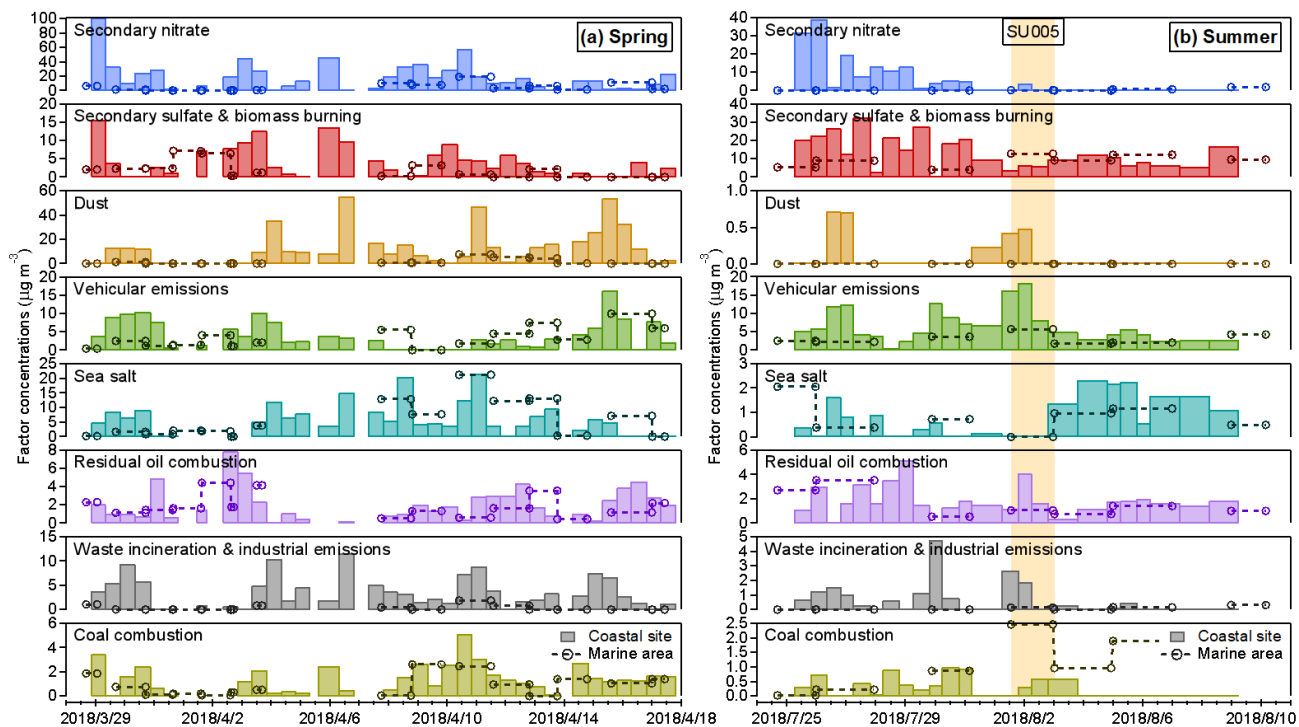

**Figure S5.** Time series of individual PMF factor concentrations for  $PM_{2.5}$  in (a) spring and (b) summer. “SU005” marked in (b) shows the factor concentrations during the sampling period of sample SU005.

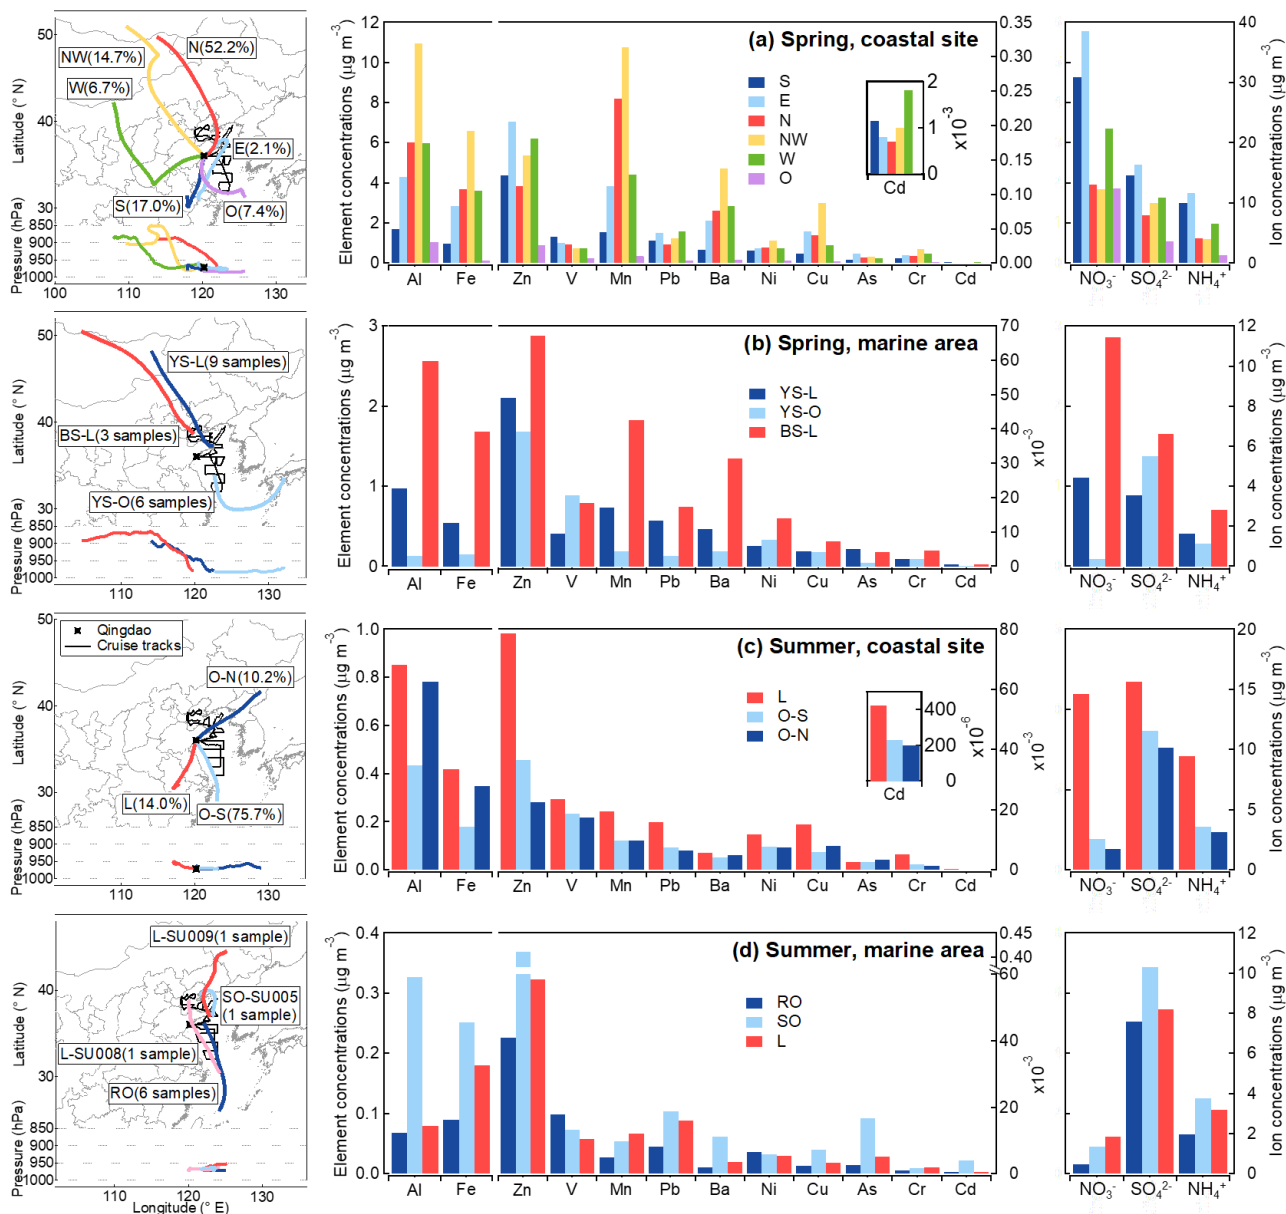

**Figure S6.** To explore the influence of air mass history on variations in trace element abundances, the backward trajectories calculated by HYSPLIT model were classified into six categories in spring and three in summer at the coastal city site, using a systematic clustering method implemented in the software SPSS (Statistical Product and Service Solutions) Statistics v21. For the cruise missions, the trajectory endpoints corresponded to the cruise coordinates, thus the samples were manually classified into three categories in both seasons. Averaged 72 h backward trajectories of air masses arriving at 300 m altitudes and the averaged concentrations of trace elements and ions of individual clusters in spring at (a) the coastal site and (b) offshore and in summer at (c) the coastal site and (d) the offshore area. The black star indicates the coastal site, Qingdao. The solid black line indicates the cruise tracks. “YS-O” means “YS-ocean”. Al and Fe use the left labels, other elements use the right labels.

## Supplemental Tables

**Table S1.** Bootstrap (BS) mapping of 9-factor solution based on PMF.

|               | Base factor 1 | Base factor 2 | Base factor 3 | Base factor 4 | Base factor 5 | Base factor 6 | Base factor 7 | Base factor 8 | Base factor 9 | Unmapped |
|---------------|---------------|---------------|---------------|---------------|---------------|---------------|---------------|---------------|---------------|----------|
| Boot factor 1 | 100           | 0             | 0             | 0             | 0             | 0             | 0             | 0             | 0             | 0        |
| Boot factor 2 | 0             | 100           | 0             | 0             | 0             | 0             | 0             | 0             | 0             | 0        |
| Boot factor 3 | 0             | 0             | 100           | 0             | 0             | 0             | 0             | 0             | 0             | 0        |
| Boot factor 4 | 0             | 2             | 1             | 92            | 0             | 0             | 0             | 4             | 0             | 1        |
| Boot factor 5 | 0             | 0             | 1             | 0             | 95            | 0             | 1             | 1             | 0             | 2        |
| Boot factor 6 | 0             | 0             | 0             | 0             | 0             | 100           | 0             | 0             | 0             | 0        |
| Boot factor 7 | 1             | 0             | 12            | 0             | 1             | 0             | 74*           | 10            | 0             | 2        |
| Boot factor 8 | 1             | 0             | 0             | 0             | 0             | 0             | 1             | 98            | 0             | 0        |
| Boot factor 9 | 2             | 8             | 13            | 0             | 1             | 0             | 3             | 9             | 58*           | 6        |

\*. The mapping percentages were less than 75% using the BS uncertainty method.

**Table S2.** BS mapping of 8-factor solution based on PMF.

|               | Base factor 1 | Base factor 2 | Base factor 3 | Base factor 4 | Base factor 5 | Base factor 6 | Base factor 7 | Base factor 8 | Unmapped |
|---------------|---------------|---------------|---------------|---------------|---------------|---------------|---------------|---------------|----------|
| Boot factor 1 | 100           | 0             | 0             | 0             | 0             | 0             | 0             | 0             | 0        |
| Boot factor 2 | 0             | 99            | 0             | 0             | 0             | 1             | 0             | 0             | 0        |
| Boot factor 3 | 0             | 0             | 100           | 0             | 0             | 0             | 0             | 0             | 0        |
| Boot factor 4 | 1             | 1             | 0             | 96            | 0             | 0             | 0             | 2             | 0        |
| Boot factor 5 | 0             | 0             | 2             | 1             | 93            | 0             | 2             | 1             | 1        |
| Boot factor 6 | 0             | 0             | 0             | 0             | 0             | 100           | 0             | 0             | 0        |
| Boot factor 7 | 2             | 0             | 10            | 2             | 1             | 0             | 75            | 7             | 3        |
| Boot factor 8 | 0             | 0             | 0             | 0             | 0             | 0             | 0             | 100           | 0        |

**Table S3.** BS mapping of 7-factor solution based on PMF.

|               | Base factor 1 | Base factor 2 | Base factor 3 | Base factor 4 | Base factor 5 | Base factor 6 | Base factor 7 | Unmapped |
|---------------|---------------|---------------|---------------|---------------|---------------|---------------|---------------|----------|
| Boot factor 1 | 98            | 0             | 0             | 0             | 0             | 1             | 0             | 1        |
| Boot factor 2 | 0             | 96            | 1             | 0             | 1             | 1             | 1             | 0        |
| Boot factor 3 | 0             | 0             | 100           | 0             | 0             | 0             | 0             | 0        |
| Boot factor 4 | 3             | 4             | 8             | 74*           | 5             | 2             | 3             | 1        |
| Boot factor 5 | 1             | 5             | 3             | 1             | 80            | 5             | 4             | 1        |
| Boot factor 6 | 0             | 0             | 0             | 0             | 0             | 100           | 0             | 0        |
| Boot factor 7 | 1             | 1             | 0             | 0             | 0             | 0             | 98            | 0        |

\*. The mapping percentages were less than 75% using the BS uncertainty method.

**Table S4.** Comparison of concentrations ( $\text{ng m}^{-3}$ ) of trace elements over the BS and YS in this study with other studies on  $\text{PM}_{2.5}$  in oceanic regions of China.

| Area                   | Time          | Al     | Fe     | Zn   | V           | Mn   | Pb   | Ba   | Ni         | Cu         | As  | Cr          | Cd  | Reference          |
|------------------------|---------------|--------|--------|------|-------------|------|------|------|------------|------------|-----|-------------|-----|--------------------|
| BS and YS              | 2018.3–4      | 1043.2 | 648.6  | 49.9 | 14.2        | 18.4 | 11.8 | 13.0 | 8.0        | 5.0        | 3.7 | 2.6         | 0.5 | This study         |
|                        | 2018.7–8      | 93.2   | 122.0  | 76.6 | 16.0        | 6.8  | 10.7 | 3.1  | 6.3        | 3.0        | 4.4 | 1.4         | 0.8 |                    |
| BS                     | 2018.3–4      | 2562.8 | 1682.2 | 67.2 | 18.5        | 42.6 | 17.5 | 31.5 | 14.0       | 7.4        | 4.1 | 4.6         | 0.7 |                    |
|                        | 2018.7–8      | 72.6   | 162.3  | 79.7 | 13.1        | 9.6  | 15.5 | 2.9  | 5.8        | 3.0        | 4.6 | 1.9         | 0.9 |                    |
| YS                     | 2018.3–4      | 689.2  | 407.9  | 45.8 | 13.2        | 12.8 | 10.5 | 8.7  | 6.6        | 4.4        | 3.7 | 2.1         | 0.5 |                    |
|                        | 2018.7–8      | 99.1   | 110.4  | 75.7 | 16.8        | 6.0  | 9.3  | 3.1  | 6.5        | 2.9        | 4.3 | 1.2         | 0.8 |                    |
| YS                     | 2011.3–4      | 2803.3 | 1111.8 | 74.2 | 20.7        | 14.8 | 18.9 | -    | 20.1       | 11.5       | 8.6 | -           | -   | Zhao et al., 2015  |
| ECS                    | 2018.4–5      | 244.1  | 223.0  | 37.9 | <b>22.4</b> | 10.5 | 10.6 | 8.5  | <b>8.9</b> | <b>8.0</b> | 3.8 | <b>14.7</b> | 0.3 | Sun et al., 2022   |
| Pengjiayu, ECS*        | 2019.9–2020.8 | 109.9  | 71.7   | 5.7  | 0.6         | 1.9  | 1.5  | -    | 0.4        | -          | -   | -           | 0.1 | Hsieh et al., 2023 |
| Huaniao Island, ECS**  | 2015–2018     | -      | 160.0  | -    | -           | -    | -    | -    | -          | -          | -   | -           | -   | Yang et al., 2020  |
| Penghu Islands (PH)    | 2017.8–9      | 150    | 180    | 40   | 20          | 30   | 40   | -    | 10         | 20         | -   | 20          | <5  | Yuan et al., 2023  |
| Dongsha Islands (DS)   |               | 80     | 70     | 50   | <5          | 10   | 20   | -    | <5         | 20         | -   | 10          | <5  |                    |
| Nansha Islands (NS)*** |               | 50     | 50     | 30   | <5          | <5   | <5   | -    | <5         | 20         | -   | 10          | <5  |                    |
| PH                     |               | 450    | 370    | 150  | 80          | 40   | 100  | -    | 70         | 30         | -   | 50          | 30  |                    |
| DS                     | 2018.3–4      | 360    | 310    | 120  | 60          | 30   | 80   | -    | 60         | 30         | -   | 40          | 30  |                    |
| NS                     |               | 60     | 70     | 40   | 10          | 10   | 50   | -    | 20         | 10         | -   | 20          | 20  |                    |

\*. The data in this study were derived from particles with aerodynamic diameters less than  $3.1 \mu\text{m}$  ( $\text{PM}_{3.1}$ ).

\*\*. The data in this study were derived from particles with aerodynamic diameters less than  $1.8 \mu\text{m}$  ( $\text{PM}_{1.8}$ ).

\*\*\*. The three remote islands (PH, DS, and NS) were located from the south Taiwan Strait (TS) to the north South China Sea (SCS).



**Table S5.** Comparison of concentrations ( $\text{ng m}^{-3}$ ) of trace elements in Qingdao in this study with other studies on  $\text{PM}_{2.5}$  in typical cities of China.

| City            | Type         | Time           | Al     | Fe     | Zn    | V    | Mn    | Pb   | Ba   | Ni   | Cu   | As  | Cr   | Cd  | Reference          |
|-----------------|--------------|----------------|--------|--------|-------|------|-------|------|------|------|------|-----|------|-----|--------------------|
| Qingdao         | Coastal      | 2018.3–4       | 5573.5 | 3347.3 | 120.1 | 26.4 | 188.0 | 29.3 | 70.3 | 21.9 | 39.5 | 7.6 | 11.1 | 0.8 | This study         |
|                 |              | 2018.7–8       | 493.8  | 228.3  | 40.9  | 19.2 | 11.1  | 8.6  | 4.4  | 8.3  | 7.4  | 2.7 | 2.4  | 0.3 |                    |
| Qingdao         | Coastal      | 2018.6–7       | 548.9  | 347.3  | 91.7  | 9.4  | ~11   | 22.5 | ~11  | -    | -    | -   | -    | -   | Li et al., 2018    |
| Qingdao*        | Coastal      | 2019.11–12     | 935.5  | 801.0  | 57.1  | 2.3  | 29.9  | 14.9 | 19.2 | 2.5  | 43.5 | 2.5 | 4.3  | 0.5 | Zhang et al., 2021 |
| Beijing         | Inland       | 2005.3–2006.2  | 790    | 1130   | 530   | 30   | 90    | 240  | 210  | 20   | 70   | 20  | 50   | 50  | Chen et al., 2008  |
| Tianjin         | Coastal      | 2017.10–2018.8 | -      | 409    | 136   | 2    | 20    | 31   | -    | 12   | 33   | 18  | -    | -   | Zhang et al., 2021 |
| Shanghai        | Coastal      | 2016.3–2017.2  | -      | 410    | 120   | 13   | 32    | 27   | 24   | 6    | 12   | 6.6 | 4.5  | 9.6 | Chang et al., 2018 |
| Shanghai**      | Coastal      | 2004.4–2005.4  | -      | 950    | 349   | 9    | 51    | 143  | 12   | 8    | 29   | 28  | 15   | 3.7 | Chen et al., 2008  |
| Ningbo          | Coastal      | 2014.3–5       | 1430   | 1420   | 229   | 9.4  | -     | 68.9 | -    | 10.0 | 20.1 | -   | 14.1 | -   | Ming et al., 2017  |
|                 |              | 2014.6–8       | 676    | 354    | 65.3  | 3.2  | -     | 14.7 | -    | 4.0  | 4.6  | -   | 9.3  | -   |                    |
| Xiamen          | Coastal      | 2017.1–2018.1  | 210    | 290    | 86.7  | 10.6 | 14.3  | 19.3 | 11.3 | 7.1  | 7.2  | 1.6 | 8.5  | 0.5 | Wu et al., 2020    |
| Guangzhou       | Coastal      | 2008.12–2009.2 | -      | 1850   | 1360  | 20   | 150   | 450  | 70   | -    | 190  | 40  | 70   | 20  | Yang et al., 2011  |
| Hangzhou**<br>* | Near-coastal | 2018.11–2020.1 | 2194.4 | 2529.1 | 160.4 | 2.8  | 33.2  | 36.0 | 59.9 | 22.1 | 46.1 | -   | 21.2 | -   | Zhu et al., 2022   |

\*. The data in this study were derived from particles with aerodynamic diameters less than  $1 \mu\text{m}$  ( $\text{PM}_{1}$ ).

\*\*. An urban-residential site, Putuo.

\*\*\*. The data were obtained from the analysis using an energy dispersive X-ray fluorescence (EDXRF) spectrometer ( $\text{in } \mu\text{g cm}^{-2}$ ) and have been converted by the authors of this study ( $\text{in ng m}^{-3}$ ).

**Table S6.** Pearson correlations (r) of PMF factor contributions with meteorological parameters (relative humidity (RH) and wind speed (WS)), and gas pollutants concentrations (SO<sub>2</sub>, NO<sub>2</sub>, O<sub>3</sub> and CO).

| Factor                                    | RH      | WS      | SO <sub>2</sub> | NO <sub>2</sub> | O <sub>3</sub> | CO     |
|-------------------------------------------|---------|---------|-----------------|-----------------|----------------|--------|
| Secondary nitrate                         | -0.23   | -0.16   | 0.32*           | 0.47**          | 0.26*          | 0.37** |
| Secondary sulfate & biomass burning       | 0.39**  | -0.26*  | -0.39**         | -0.45**         | 0.36**         | 0.55** |
| Dust                                      | -0.72** | 0.23    | 0.19            | 0.34**          | -0.11          | -0.13  |
| Dust (spring, coastal)                    | -       | 0.42*   | -               | -               | -              | -      |
| Vehicular emissions                       | -0.07   | -0.40** | 0.04            | 0.06            | -0.35**        | 0.32*  |
| Vehicular emissions (summer)              | -0.47   | -0.57*  | 0.63**          | 0.82**          | -0.15          | 0.35   |
| Sea salt                                  | -0.58** | 0.39**  | 0.31*           | 0.47**          | -0.04          | -0.02  |
| Residual oil combustion                   | 0.15    | -0.17   | 0.40**          | 0.17            | -0.02          | 0.00   |
| Waste incineration & Industrial emissions | -0.69** | 0.05    | 0.29*           | 0.52**          | -0.17          | 0.03   |
| Coal combustion                           | -0.23   | -0.05   | 0.39**          | 0.59**          | 0.12           | 0.22   |

Note. The highest correlation coefficients for each factor are denoted in bold. No gas pollutants data was available for the cruise campaign. The meteorological parameters of the former eight samples in summer are missing values.

\*. Correlation is significant at the 0.05 level (2-tailed).

\*\*. Correlation is significant at the 0.01 level (2-tailed).

**Table S7.** The information of averaged 72 h air mass backward trajectory clusters arriving at the coastal site and marine area in spring and summer.

| Campaign             | Cluster                 | Detailed information                                                                                                                                    | Frequency         |
|----------------------|-------------------------|---------------------------------------------------------------------------------------------------------------------------------------------------------|-------------------|
| Spring, coastal site | N (North)               | From the north and passed the Inner Mongolia Autonomous region and Liaoning Province                                                                    | 52.2%             |
|                      | NW (Northwest)          | From the northwest and passed the Inner Mongolia Autonomous and BTH region                                                                              | 14.7%             |
|                      | W (West)                | From the Inner Mongolia Autonomous region and passed Shaanxi and Henan Provinces                                                                        | 6.7%              |
|                      | S (South)               | From East China near the Yangtze River Delta (YRD)                                                                                                      | 17.0%             |
|                      | E (East)                | From East China near YRD and passed YS before reversing to the Shandong Peninsula                                                                       | 2.1%              |
|                      | O (Ocean)               | Mainly from ECS and passed YS                                                                                                                           | 7.4%              |
| Spring, marine area  | BS-L (BS-Land)          | BS samples influenced by the continent air masses                                                                                                       | Three samples     |
|                      | YS-L (YS-Land)          | YS samples influenced by the continent air masses                                                                                                       | Nine samples      |
|                      | YS-O (YS-Ocean)         | YS samples influenced by the marine air masses                                                                                                          | Six samples       |
| Summer, coastal site | L (Land)                | Passed the continent of East China before arriving at QD                                                                                                | 14.0%             |
|                      | O-S (Ocean-South)       | From ECS in the south                                                                                                                                   | 75.7%             |
|                      | O-N (Ocean-North)       | From Korean Peninsula in the north                                                                                                                      | 10.2%             |
| Summer, marine area  | L (Land)                | Two samples influenced by the continent air masses, one passed the coastline of southeastern China (L-SU008), another from the northern China (L-SU009) | Two samples       |
|                      | RO (Remote oceans)      | Samples influenced by remote ocean air masses                                                                                                           | Six samples       |
|                      | SO (Surrounding oceans) | BS sample influenced by the air masses lingered over the CBS region                                                                                     | One sample, SU005 |

**Table S8.** Percentage contributions (%) of various source factors to individual elements based on PMF.

| Element | Season | location | Secondary<br>nitrate | Sulfate<br>&BB | Dust | VE   | Sea salt | ROC  | WI&IE | CC   |
|---------|--------|----------|----------------------|----------------|------|------|----------|------|-------|------|
| Fe      | Spring | Coastal  | 1.6                  | 0.2            | 77.8 | 1.2  | 1.8      | 1.9  | 9.6   | 5.8  |
|         |        | Marine   | 2.4                  | 0.6            | 45.5 | 6.7  | 11.3     | 10.0 | 3.8   | 19.7 |
|         | Summer | Coastal  | 5.2                  | 8.7            | 6.4  | 21.8 | 3.5      | 21.2 | 19.6  | 13.6 |
|         |        | Marine   | 0.4                  | 5.8            | 0    | 10.4 | 2.9      | 19.5 | 2.7   | 58.3 |
| Mn      | Spring | Coastal  | 3.2                  | 0.7            | 67.9 | 1.4  | 1.2      | 1.8  | 18.0  | 5.9  |
|         |        | Marine   | 4.7                  | 2.0            | 40.5 | 7.9  | 7.9      | 9.5  | 7.2   | 20.3 |
|         | Summer | Coastal  | 7.2                  | 19.4           | 4.0  | 18.0 | 1.7      | 14.0 | 26.0  | 9.8  |
|         |        | Marine   | 0.6                  | 15.7           | 0    | 10.4 | 1.7      | 15.8 | 4.5   | 51.2 |
| Cr      | Spring | Coastal  | 9.5                  | 2.3            | 46.1 | 0.4  | 0.1      | 2.7  | 31.0  | 7.8  |
|         |        | Marine   | 13.4                 | 6.7            | 26.1 | 2.2  | 0.8      | 13.4 | 11.8  | 25.6 |
|         | Summer | Coastal  | 12.3                 | 38.2           | 1.5  | 3.0  | 0.1      | 11.9 | 25.6  | 7.4  |
|         |        | Marine   | 1.2                  | 34.2           | 0    | 1.9  | 0.1      | 14.8 | 4.8   | 42.9 |
| Ni      | Spring | Coastal  | 4.5                  | 2.5            | 39.2 | 2.4  | 2.0      | 23.3 | 22.5  | 3.7  |
|         |        | Marine   | 3.2                  | 3.7            | 11.2 | 6.5  | 6.4      | 58.6 | 4.3   | 6.1  |
|         | Summer | Coastal  | 3.0                  | 21.5           | 0.7  | 9.1  | 0.8      | 53.4 | 9.6   | 1.8  |
|         |        | Marine   | 0.3                  | 18.3           | 0    | 5.6  | 0.9      | 63.3 | 1.7   | 9.9  |
| V       | Spring | Coastal  | 5.9                  | 3.8            | 0    | 3.8  | 0        | 56.3 | 30.1  | 0    |
|         |        | Marine   | 2.5                  | 3.4            | 0    | 6.2  | 0        | 84.4 | 3.5   | 0    |
|         | Summer | Coastal  | 2.1                  | 17.1           | 0    | 7.6  | 0        | 66.6 | 6.6   | 0    |
|         |        | Marine   | 0.2                  | 14.6           | 0    | 4.6  | 0        | 79.3 | 1.2   | 0    |
| Cu      | Spring | Coastal  | 1.4                  | 0.7            | 15.3 | 7.6  | 0        | 0.7  | 70.1  | 4.2  |
|         |        | Marine   | 2.1                  | 2.0            | 8.9  | 42.0 | 0        | 3.6  | 27.4  | 14.1 |
|         | Summer | Coastal  | 1.4                  | 8.3            | 0.4  | 41.7 | 0        | 2.3  | 43.0  | 2.9  |
|         |        | Marine   | 0.2                  | 11.8           | 0    | 42.9 | 0        | 4.7  | 13.1  | 27.4 |
| Zn      | Spring | Coastal  | 16.6                 | 5.0            | 0    | 0    | 7.4      | 2.4  | 55.4  | 13.1 |
|         |        | Marine   | 14.6                 | 9.1            | 0    | 0    | 28.9     | 7.4  | 13.2  | 26.9 |
|         | Summer | Coastal  | 12.0                 | 46.3           | 0    | 0    | 3.3      | 5.8  | 25.5  | 6.9  |
|         |        | Marine   | 1.2                  | 41.9           | 0    | 0    | 3.8      | 7.4  | 4.9   | 40.8 |
| Cd      | Spring | Coastal  | 4.5                  | 4.3            | 6.0  | 2.7  | 15.0     | 0.8  | 15.1  | 51.7 |
|         |        | Marine   | 2.0                  | 4.0            | 1.1  | 4.7  | 30.2     | 1.3  | 1.9   | 54.8 |
|         | Summer | Coastal  | 3.3                  | 40.8           | 0.1  | 11.4 | 6.9      | 2.1  | 7.2   | 28.2 |
|         |        | Marine   | 0.1                  | 16.6           | 0    | 3.3  | 3.6      | 1.2  | 0.6   | 74.5 |
| Pb      | Spring | Coastal  | 15.7                 | 4.0            | 8.7  | 1.2  | 8.8      | 1.6  | 29.4  | 30.7 |
|         |        | Marine   | 10.1                 | 5.2            | 2.2  | 2.9  | 24.9     | 3.7  | 5.1   | 45.9 |
|         | Summer | Coastal  | 12.5                 | 40.4           | 0.2  | 5.4  | 4.3      | 4.4  | 14.9  | 17.9 |
|         |        | Marine   | 0.8                  | 22.9           | 0    | 2.2  | 3.1      | 3.5  | 1.8   | 65.8 |
| As      | Spring | Coastal  | 0                    | 1.4            | 36.4 | 13.0 | 0        | 0    | 2.7   | 46.5 |
|         |        | Marine   | 0                    | 1.6            | 8.3  | 28.3 | 0        | 0    | 0.4   | 61.4 |
|         | Summer | Coastal  | 0                    | 13.8           | 0.7  | 57.8 | 0        | 0    | 1.4   | 26.4 |
|         |        | Marine   | 0                    | 6.1            | 0    | 18.3 | 0        | 0    | 0.1   | 75.5 |

Note. Sulfate&BB represents sulfate & biomass burning. VE represents vehicular emissions. ROC represents residual oil combustion. WI&IE represents waste incineration & industrial emissions. CC represents coal combustion.

## References

- Chang, Y., Huang, K., Xie, M., Deng, C., Zou, Z., Liu, S., and Zhang, Y.: First long-term and near real-time measurement of trace elements in China's urban atmosphere: Temporal variability, source apportionment and precipitation effect. *Atmos. Chem. Phys.*, 18, 11793-11812. <https://doi.org/10.5194/acp-18-11793-2018>, 2018.
- Chen, J., Tan, M., Li, Y., Zheng, J., Zhang, Y., Shan, Z., Zhang, G., and Li, Y.: Characteristics of trace elements and lead isotope ratios in PM<sub>2.5</sub> from four sites in Shanghai, *J. Hazard. Mater.*, 156, 36-43, <https://doi.org/10.1016/j.jhazmat.2007.11.122>, 2008.
- Hsieh, C. -C., You, C. -F., & Ho, T. -Y.: The solubility and deposition flux of East Asian aerosol metals in the East China Sea: The effects of aeolian transport processes. *Mar. Chem.*, 253, 104268. <https://doi.org/10.1016/j.marchem.2023.104268>, 2023.
- Li, P., Li, Q., Shi, J., Gao, H., and Yao, X.: Concentration, solubility, and dry deposition flux of trace elements in fine and coarse particles in Qingdao during summer (in Chinese), *Environ. Sci.*, 39, 3067-3074, <https://doi.org/10.13227/j.hjlx.201712231>, 2018.
- Ming, L., Jin, L., Li, J., Fu, P., Yang, W., Liu, D., Zhang, G., Wang, Z., and Li, X.: PM<sub>2.5</sub> in the Yangtze River Delta, China: Chemical compositions, seasonal variations, and regional pollution events. *Environ. Pollut.*, 223, 200-212. <https://doi.org/10.1016/j.envpol.2017.01.013>, 2017.
- Sun, H., Sun, J., Zhu, C., Yu, L., Lou, Y., Li, R., and Lin, Z.: Chemical characterizations and sources of PM<sub>2.5</sub> over the offshore Eastern China sea: Water soluble ions, stable isotopic compositions, and metal elements. *Atmos. Pollut. Res.*, 13, 101410. <https://doi.org/10.1016/j.apr.2022.101410>, 2022.
- Wu, S. P., Cai, M. J., Xu, C., Zhang, N., Zhou, J. B., Yan, J. P., Schwab, J. J., and Yuan, C. S.: Chemical nature of PM<sub>2.5</sub> and PM<sub>10</sub> in the coastal urban Xiamen, China: Insights into the impacts of shipping emissions and health risk, *Atmos. Environ.*, 227, <https://doi.org/10.1016/j.atmosenv.2020.117383>, 2020.
- Yang, F., Tan, J., Zhao, Q., Du, Z., He, K., Ma, Y., Duan, F., Chen, G., and Zhao, Q.: Characteristics of PM<sub>2.5</sub> speciation in representative megacities and across China, *Atmos. Chem. Phys.*, 11, 5207-5219, <https://doi.org/10.5194/acp-11-5207-2011>, 2011.
- Yang, T., Chen, Y., Zhou, S., Li, H., Wang, F., and Zhu, Y.: Solubilities and deposition fluxes of atmospheric Fe and Cu over the Northwest Pacific and its marginal seas, *Atmos. Environ.*, 239, 117763, <https://doi.org/10.1016/j.atmosenv.2020.117763>, 2020.
- Yuan, C. -S., Hung, C. -M., Hung, K. -N., Yang, Z. -M., Cheng, P. -H., and Soong, K. -Y.: Route-based chemical significance and source origin of marine PM<sub>2.5</sub> at three remote islands in East Asia: Spatiotemporal variation and long-range transport. *Atmos. Pollut. Res.*, 14, 101762. <https://doi.org/10.1016/j.apr.2023.101762>, 2023.
- Zhang, H., Li, R., Dong, S., Wang, F., Zhu, Y., Meng, H., Huang, C., Ren, Y., Wang, X., Hu, X., Li, T., Peng, C., Zhang, G., Xue, L., Wang, X., and Tang, M.: Abundance and Fractional Solubility of Aerosol Iron During Winter

at a Coastal City in Northern China: Similarities and Contrasts Between Fine and Coarse Particles, *J. Geophys. Res.-Atmos.*, 127, <https://doi.org/10.1029/2021JD036070>, 2022.

Zhang, W., Peng, X., Bi, X., Cheng, Y., Liang, D., Wu, J., Tian, Y., Zhang, Y., and Feng, Y.: Source apportionment of PM<sub>2.5</sub> using online and offline measurements of chemical components in Tianjin, China. *Atmos. Environ.*, 244, 117942. <https://doi.org/10.1016/j.atmosenv.2020.117942>, 2021.

Zhao, R., Han, B., Lu, B., Zhang, N., Zhu, L., and Bai, Z.: Element composition and source apportionment of atmospheric aerosols over the China Sea. *Atmos. Pollut. Res.*, 6, 191-201. <http://doi.org/10.5094/APR.2015.023>, 2015.

Zhu, Y., Li, W., Wang, Y., Zhang, J., Liu, L., Xu, L., Xu, J., Shi, J., Shao, L., Fu, P., Zhang, D., and Shi, Z.: Sources and processes of iron aerosols in a megacity in Eastern China, *Atmos. Chem. Phys.*, 22, 2191-2202. <https://doi.org/10.5194/acp-22-2191-2022>, 2022.
