# Supplementary figures and images for: Elevated Anthropogenic Contributions to Trace Elements in Marine Aerosols Compared to Coastal Qingdao in Eastern China
Source: Copernicus journal article supplement (doi:10.5194/egusphere-2025-4005), 2025-09-09

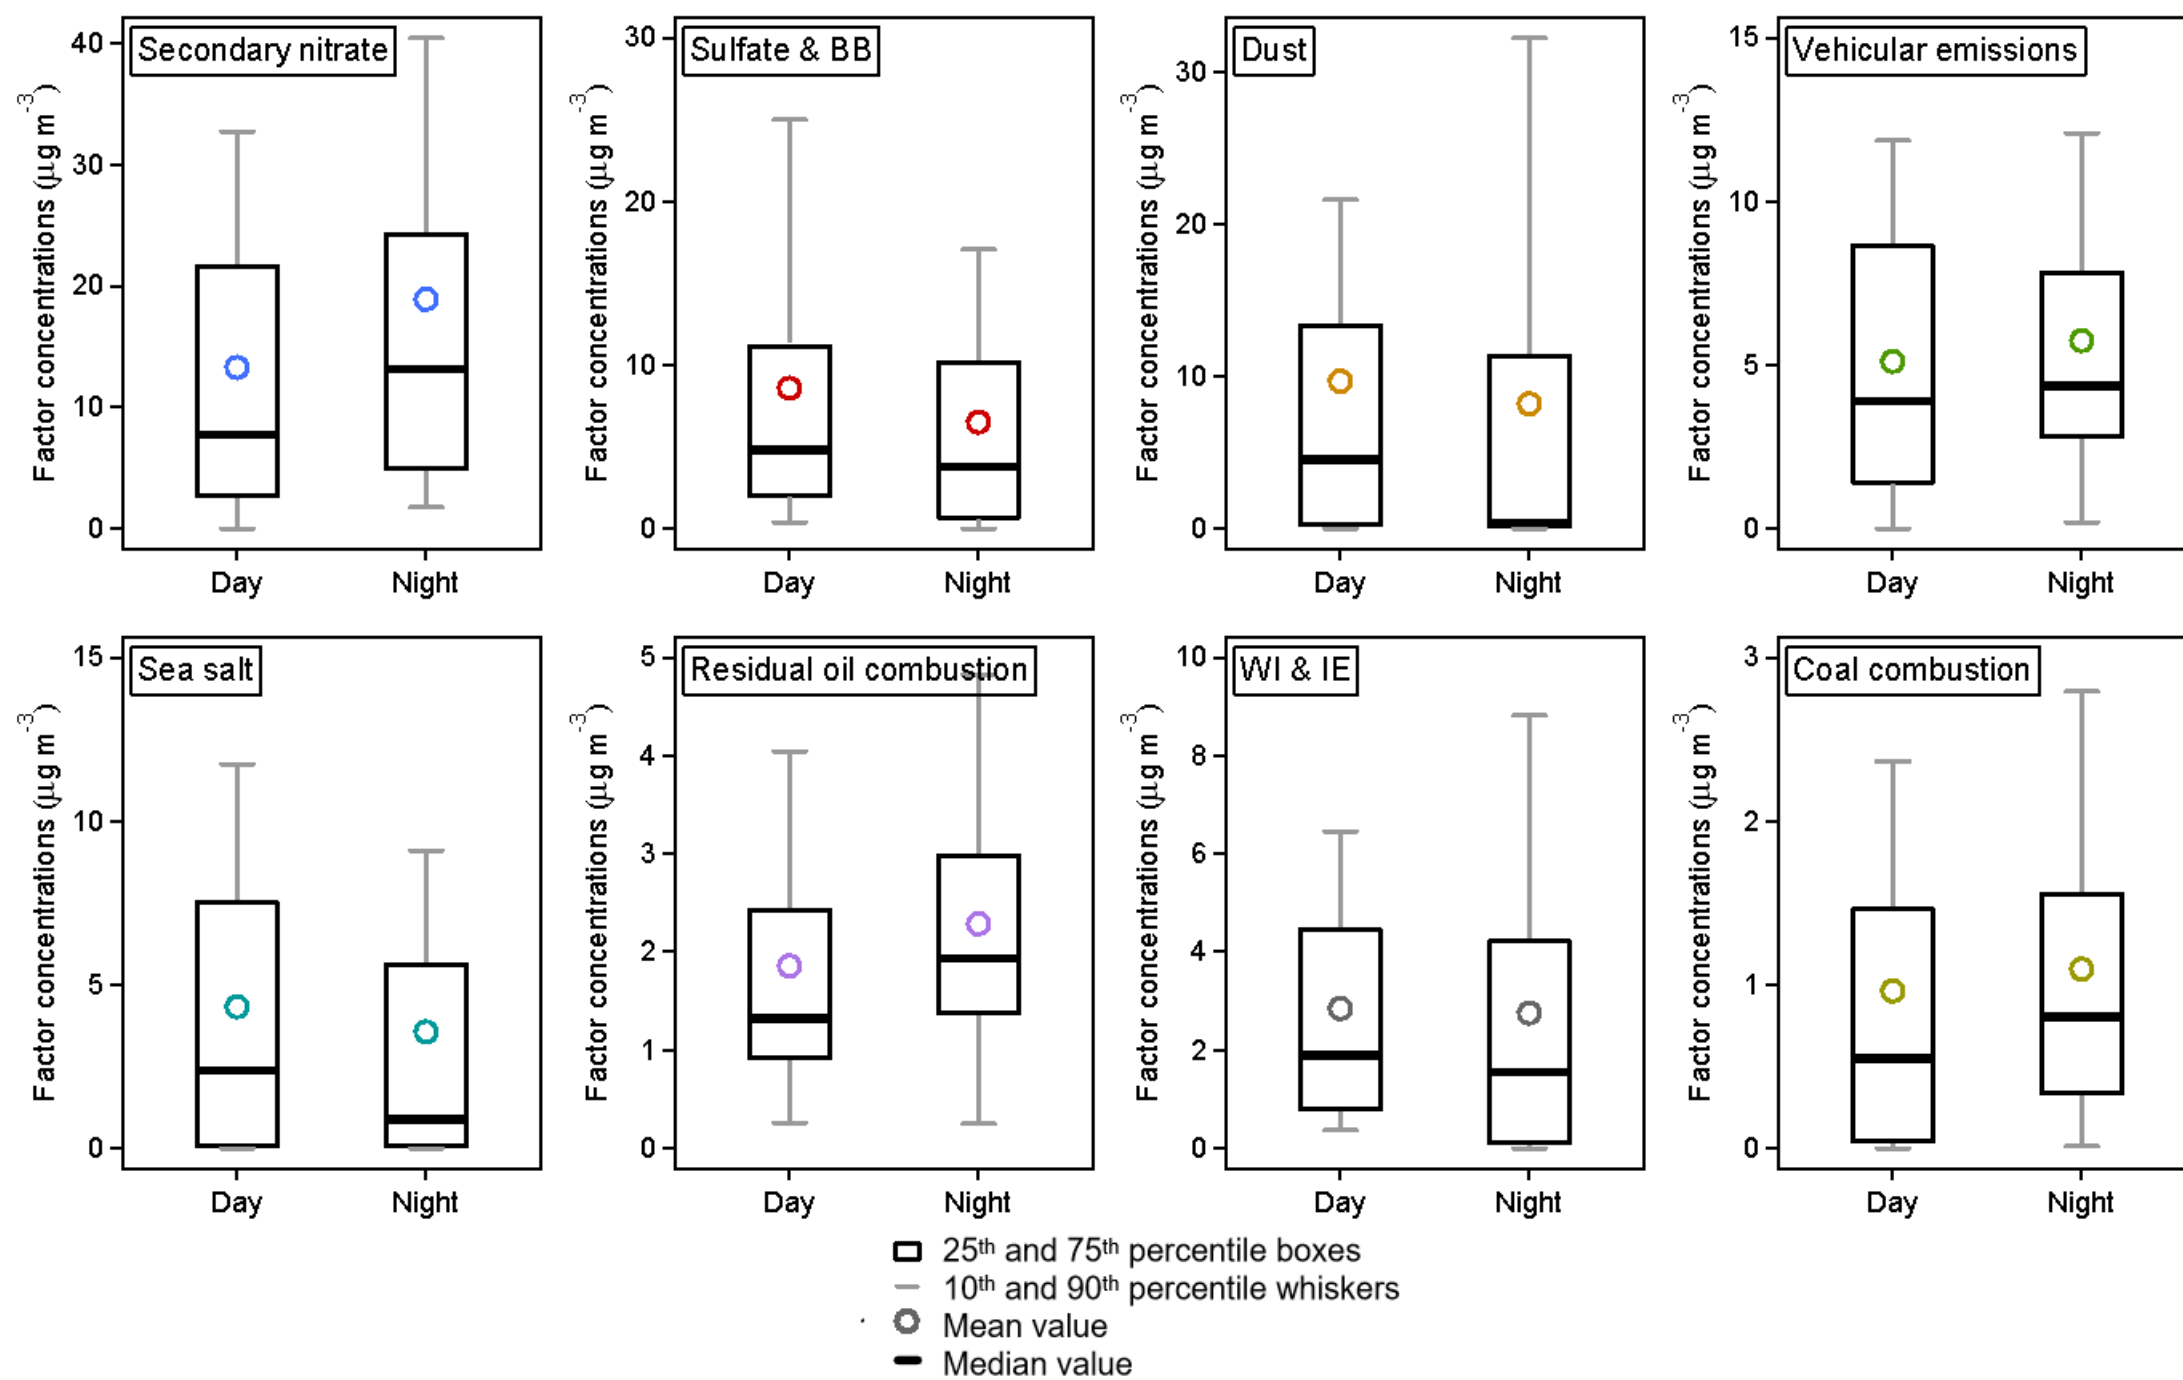

Supplement: Supplementary file 2 [file egusphere-2025-4005-supplement.zip]

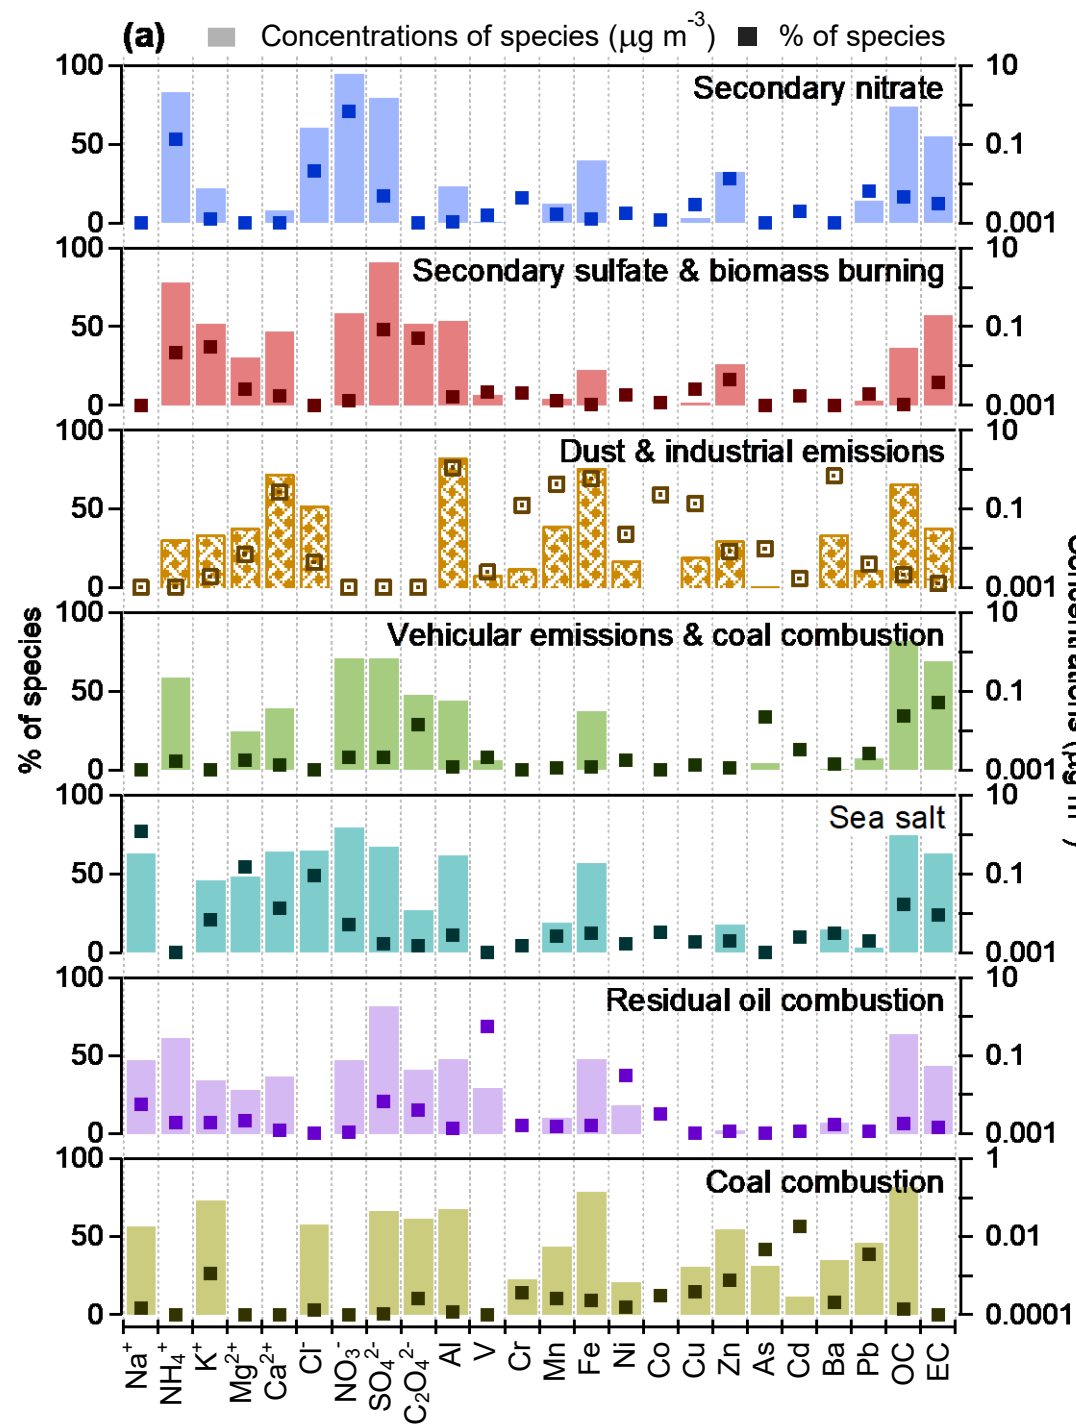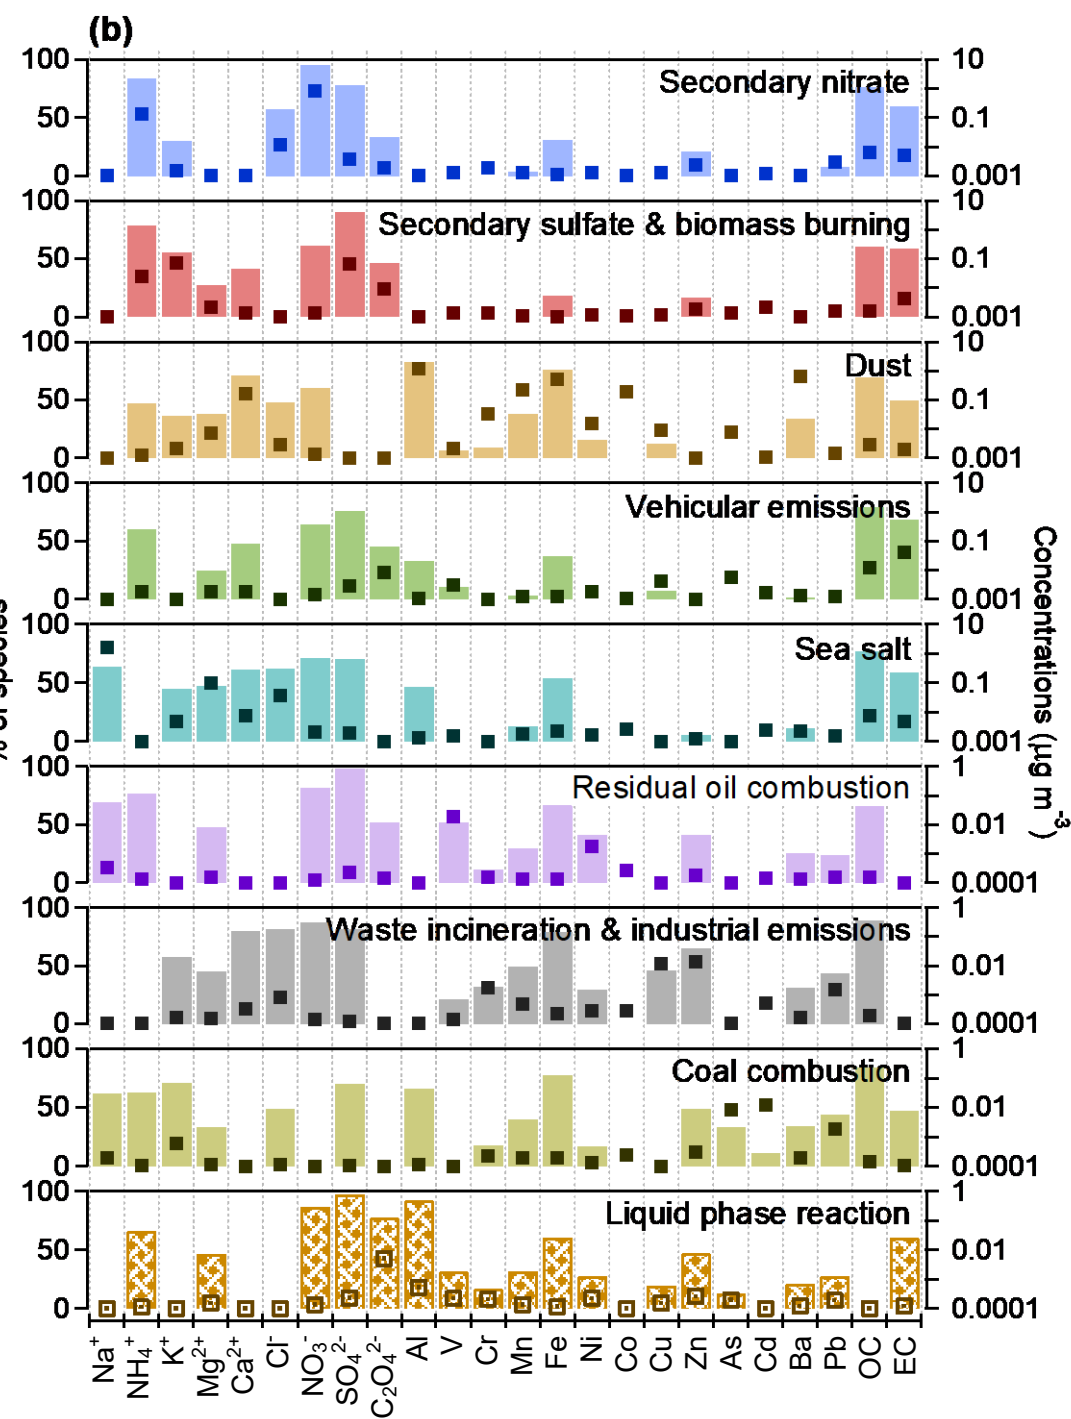

Supplement: Supplementary file 3 [file egusphere-2025-4005-supplement.zip]

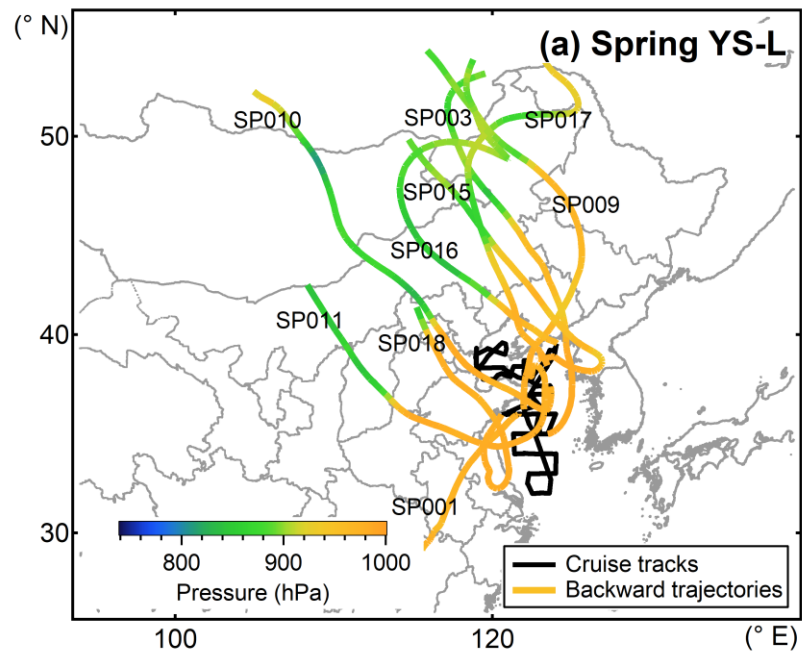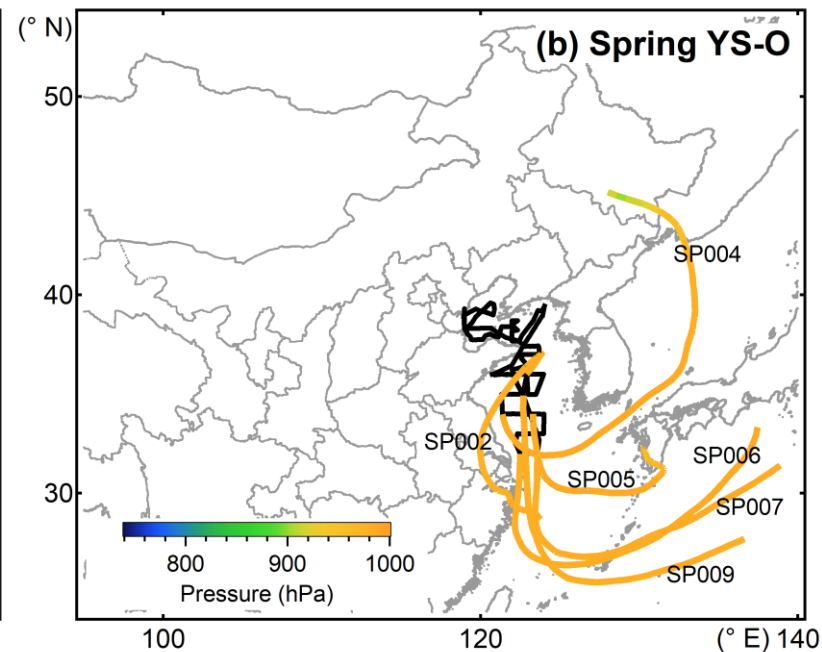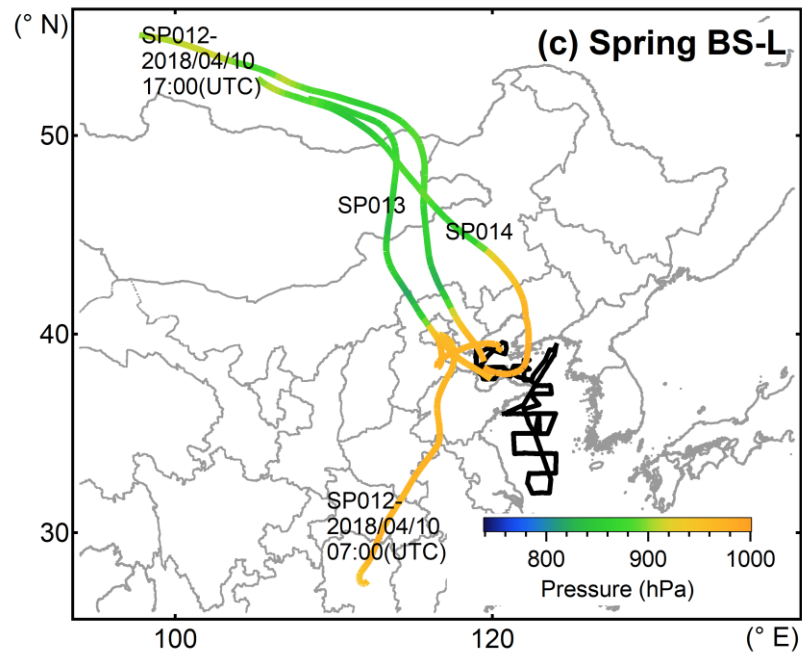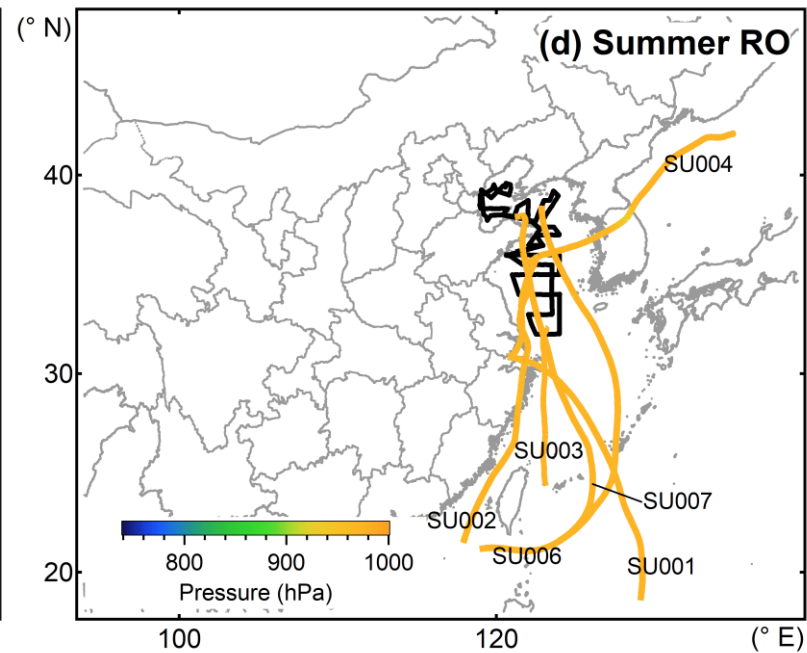

Supplement: Supplementary file 4 [file egusphere-2025-4005-supplement.zip]

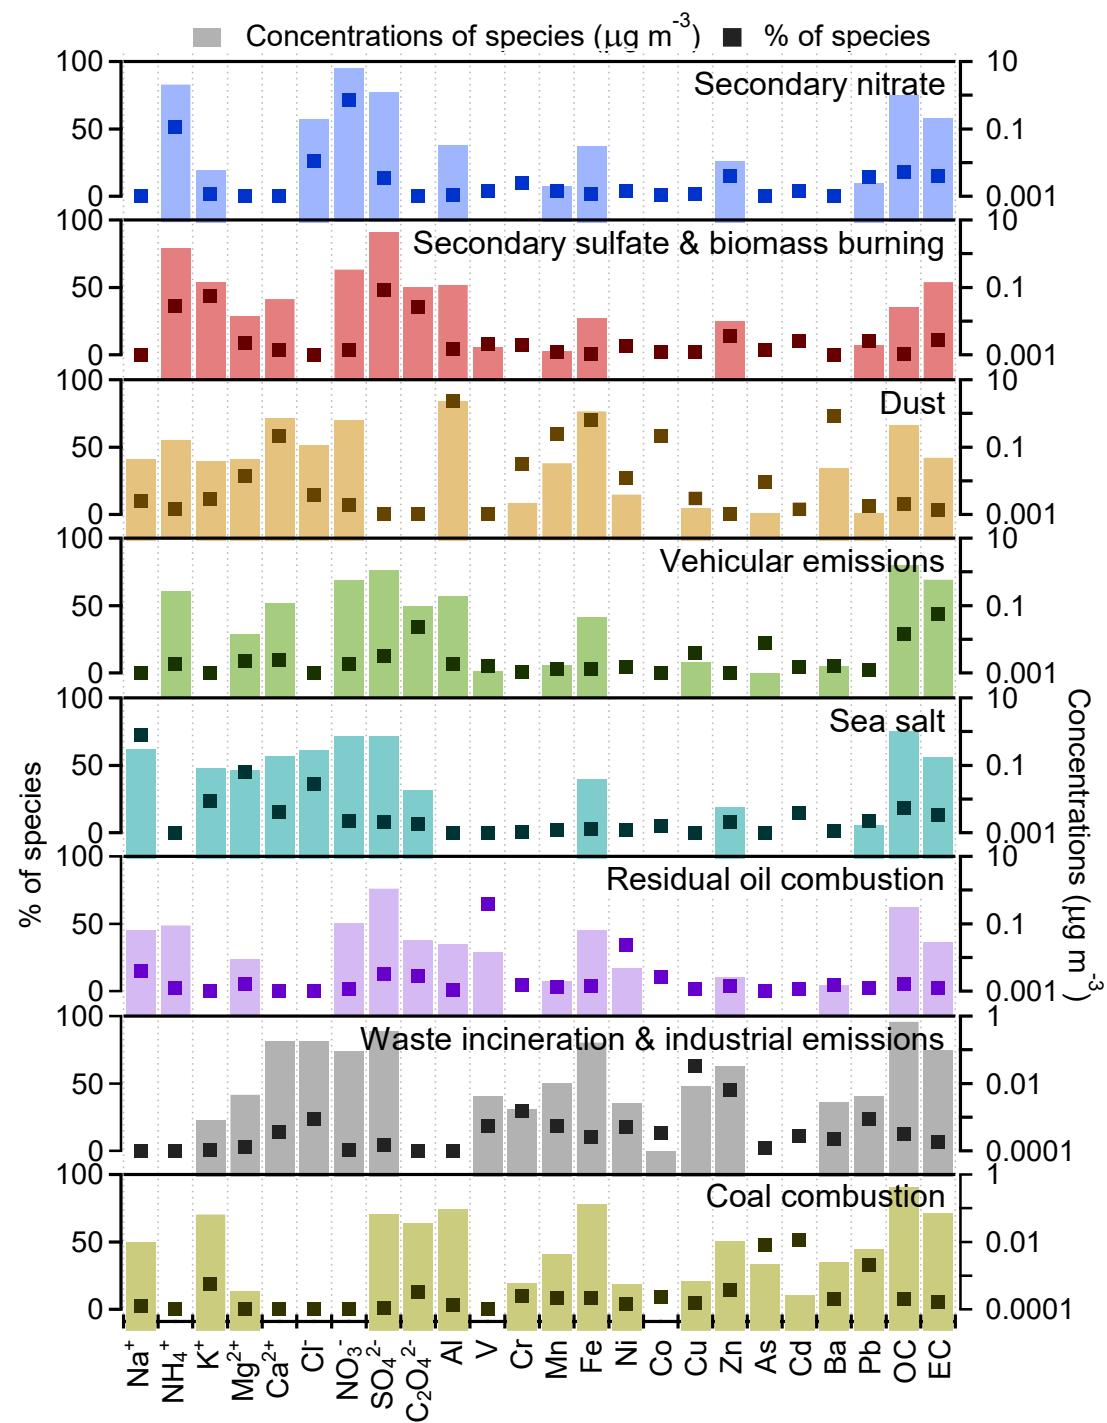

Supplement: Supplementary file 5 [file egusphere-2025-4005-supplement.zip]

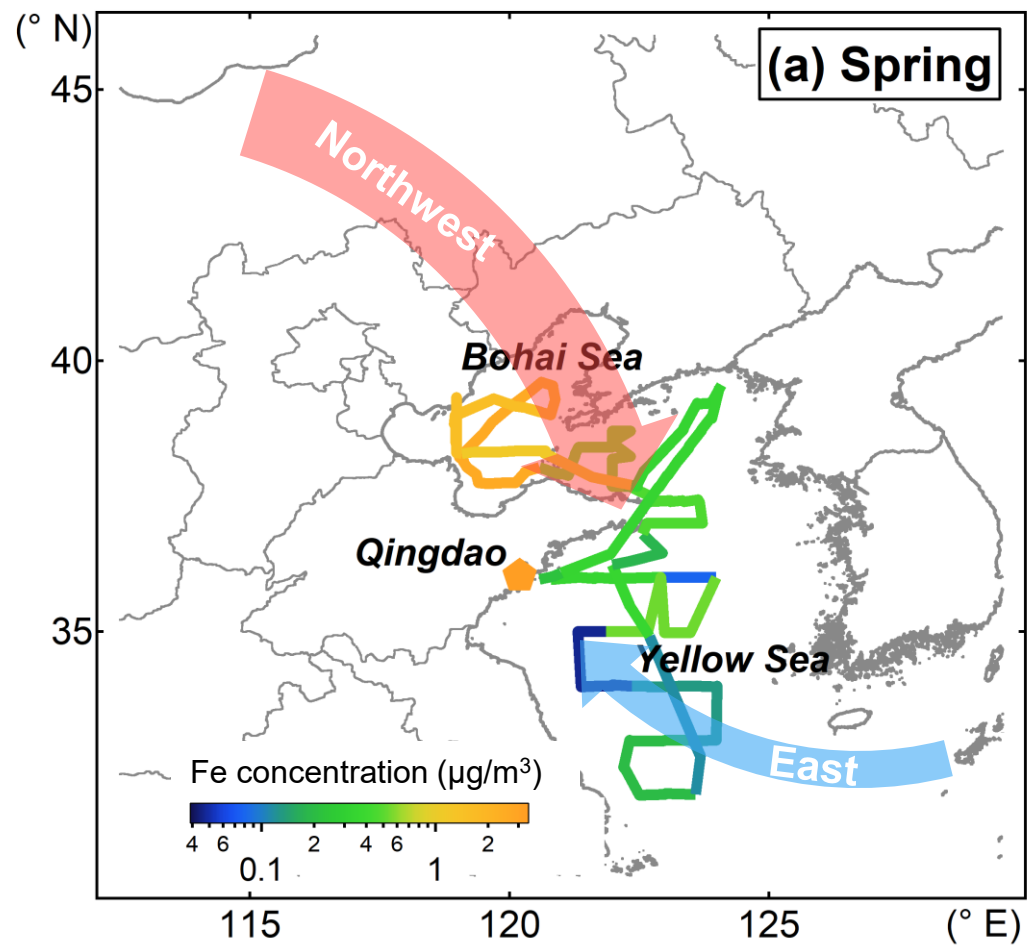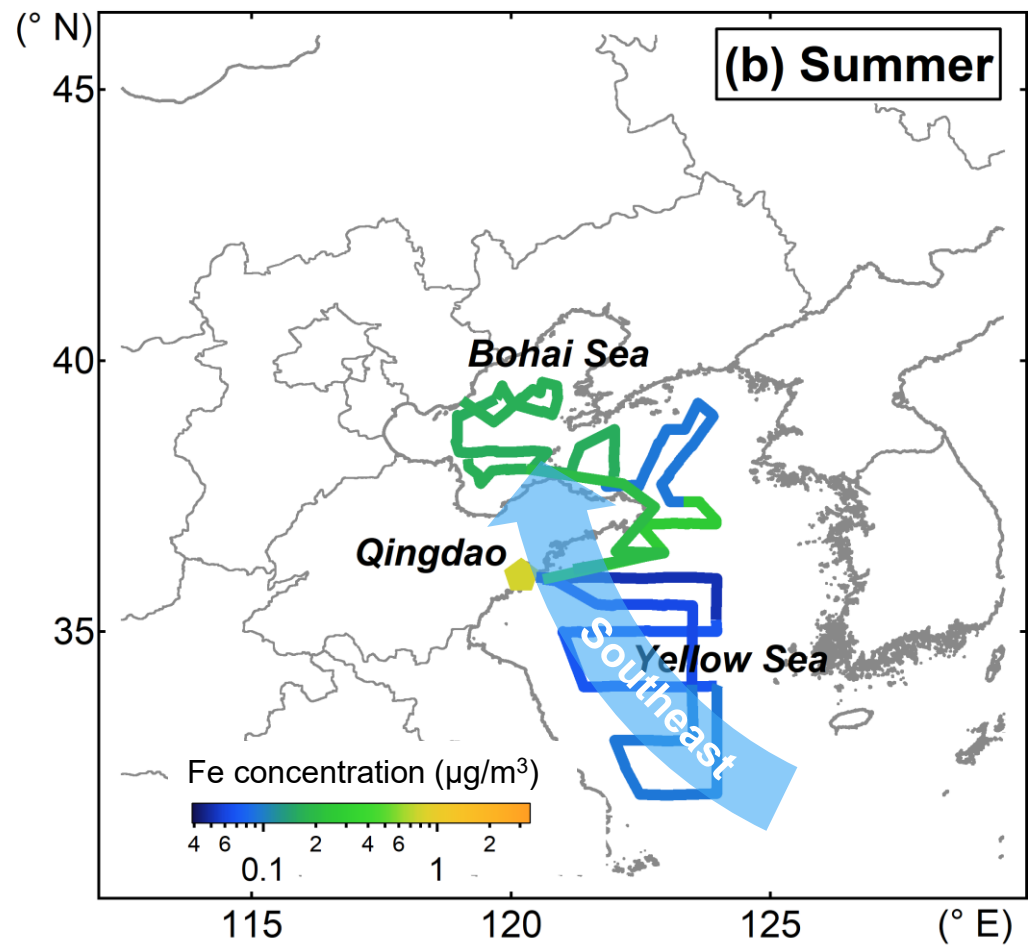

Supplement: Supplementary file 6 [file egusphere-2025-4005-supplement.zip]

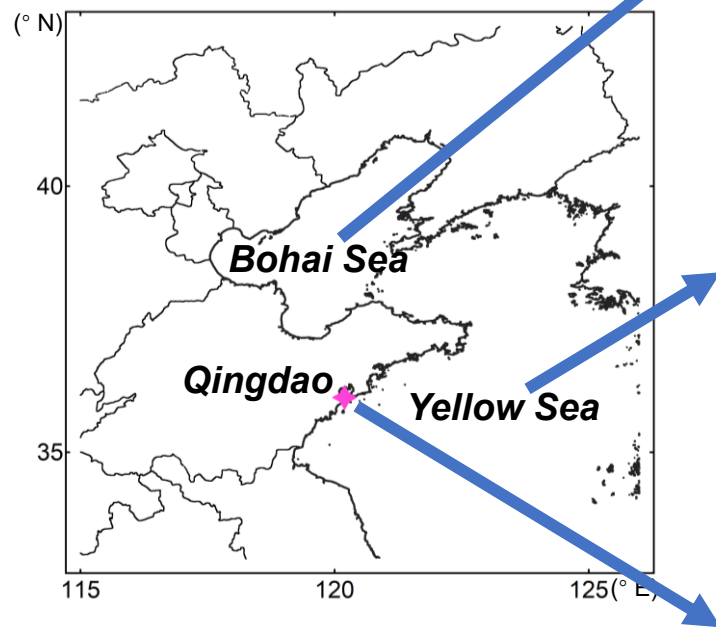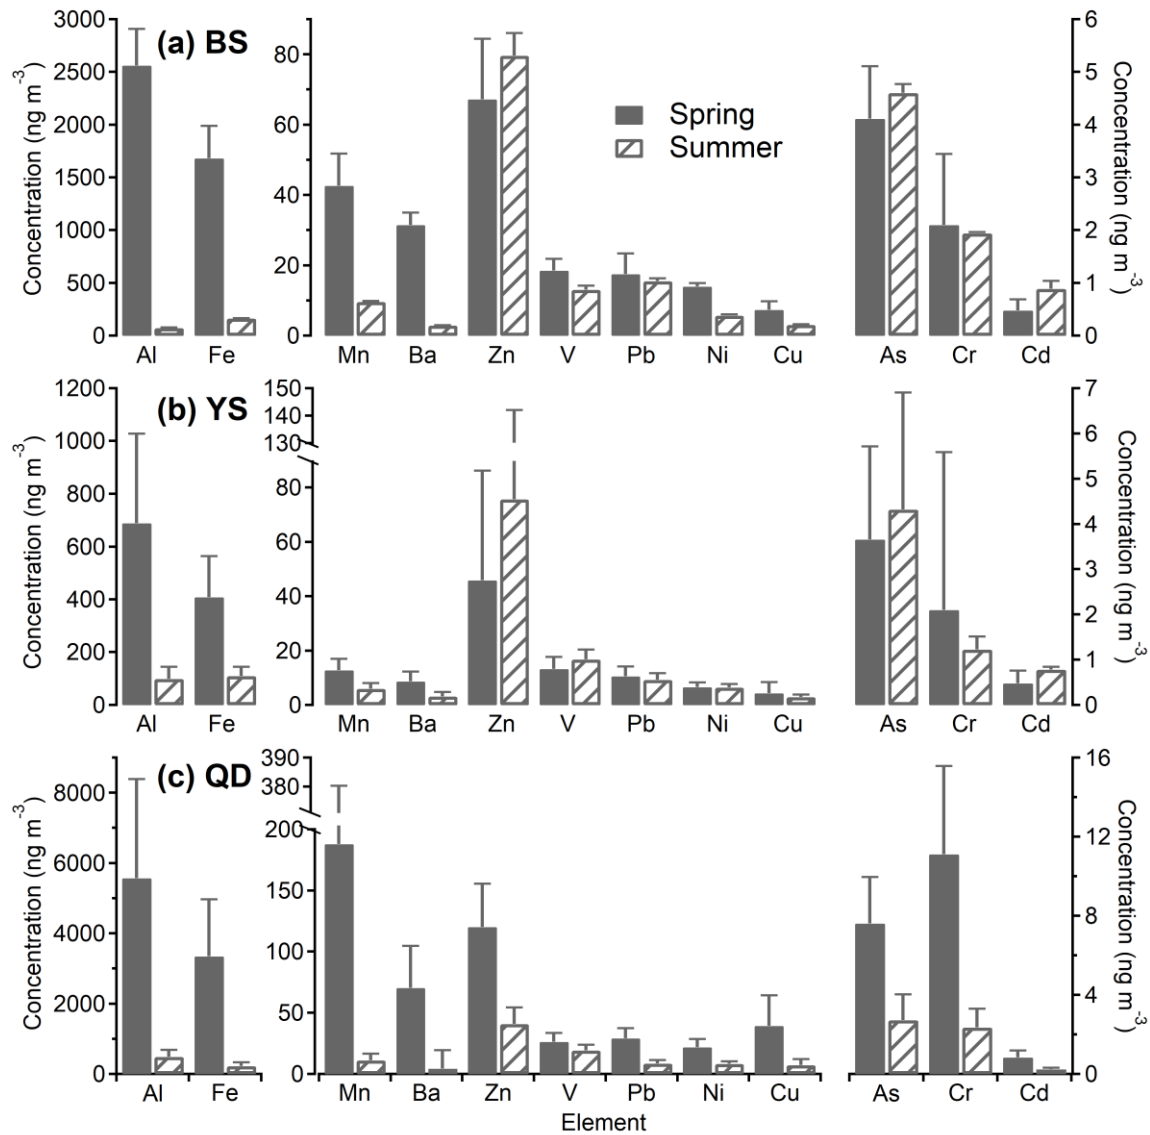

Supplement: Supplementary file 7 [file egusphere-2025-4005-supplement.zip]

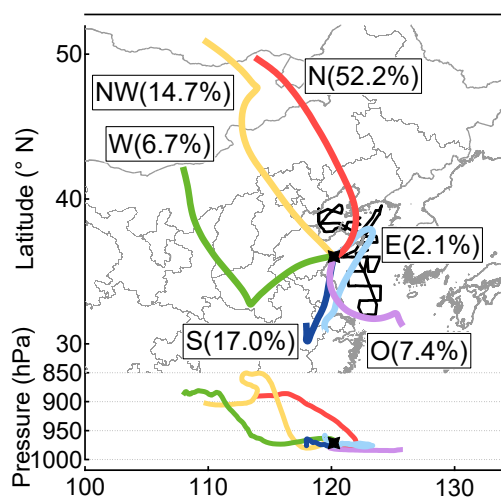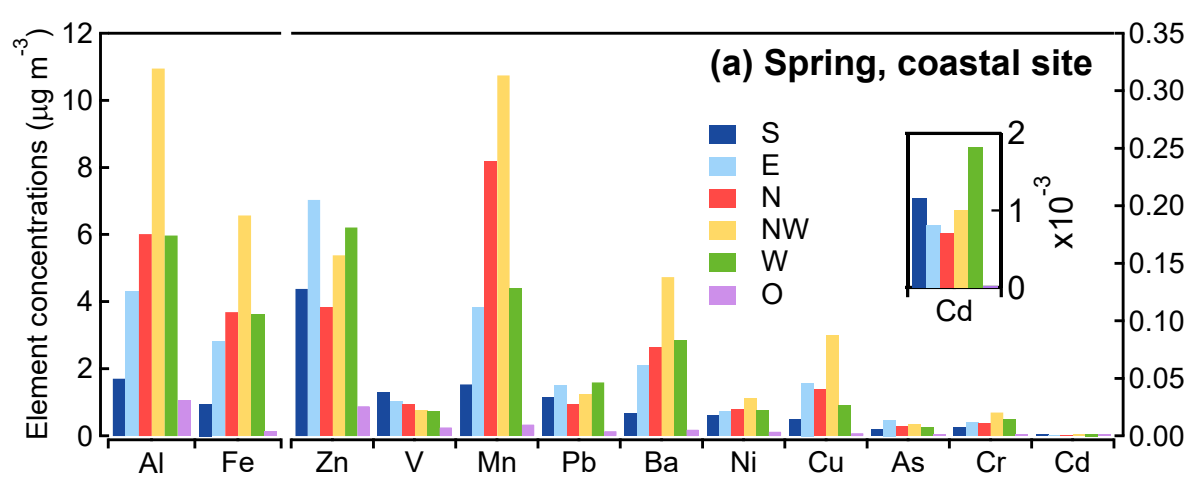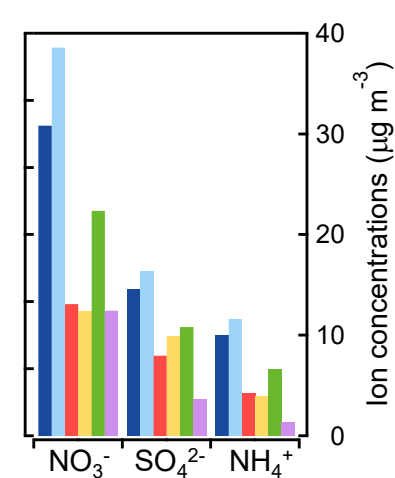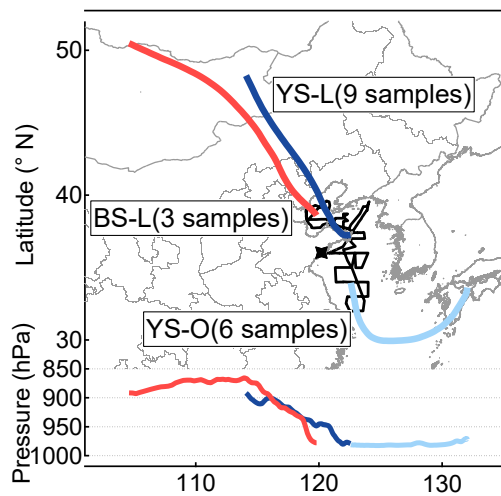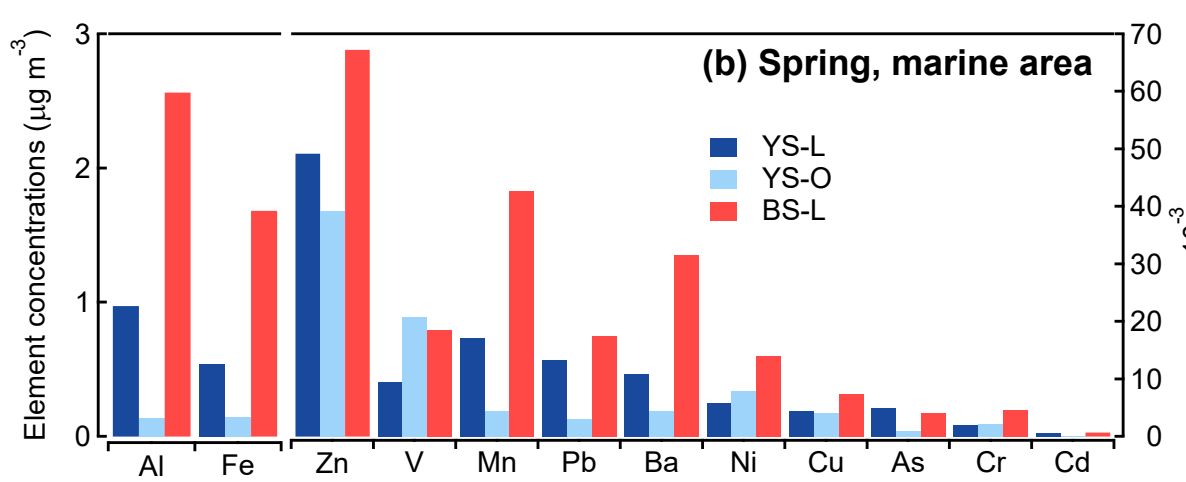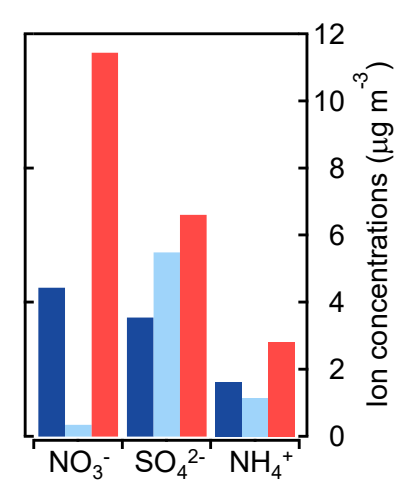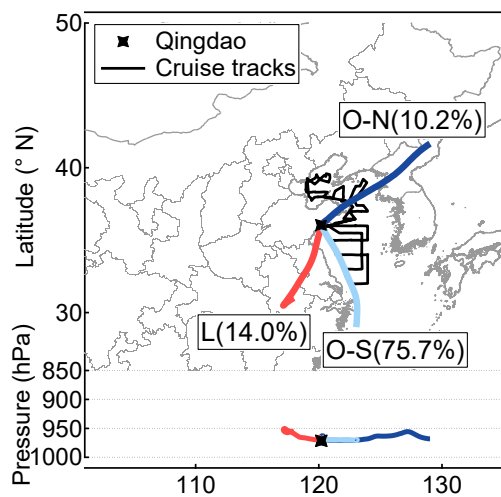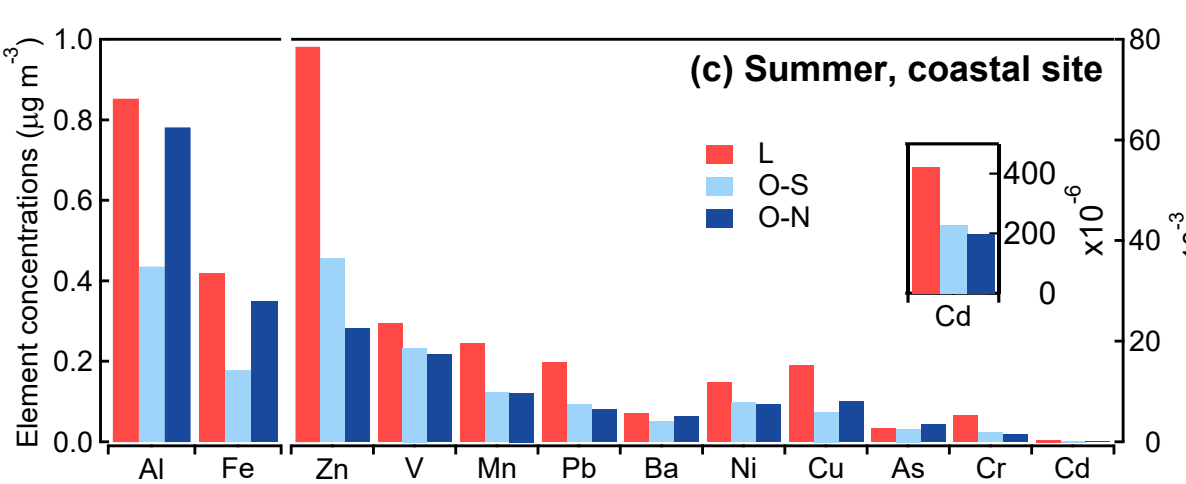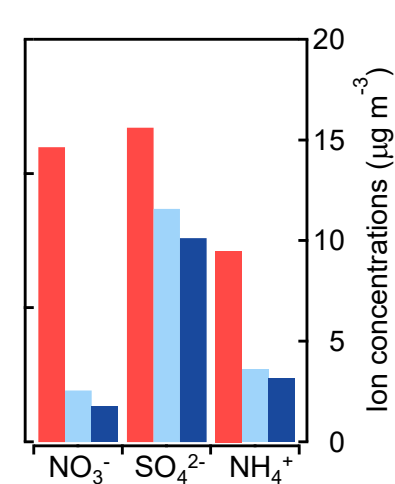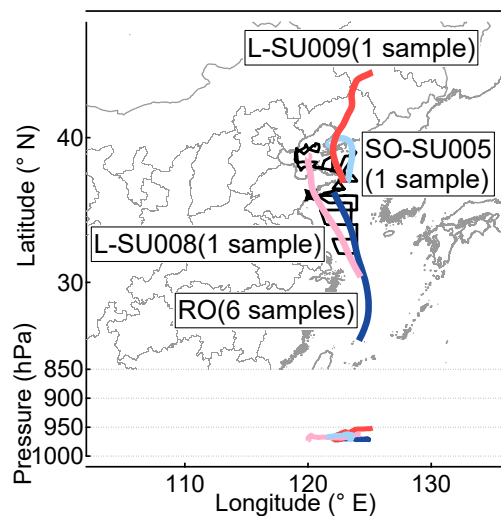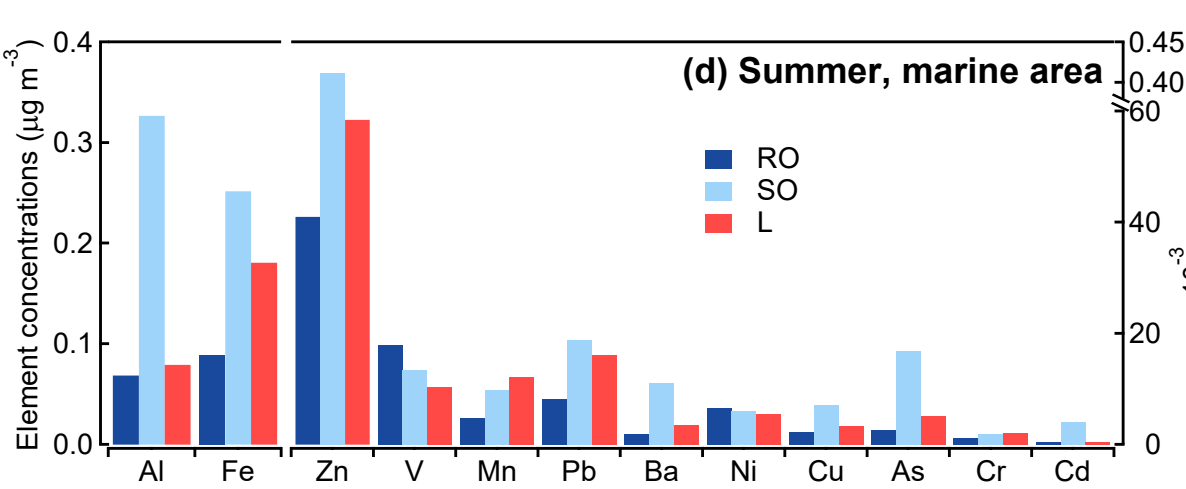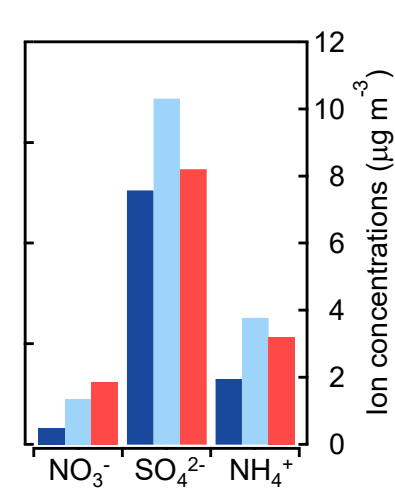

Supplement: Supplementary file 8 [file egusphere-2025-4005-supplement.zip]

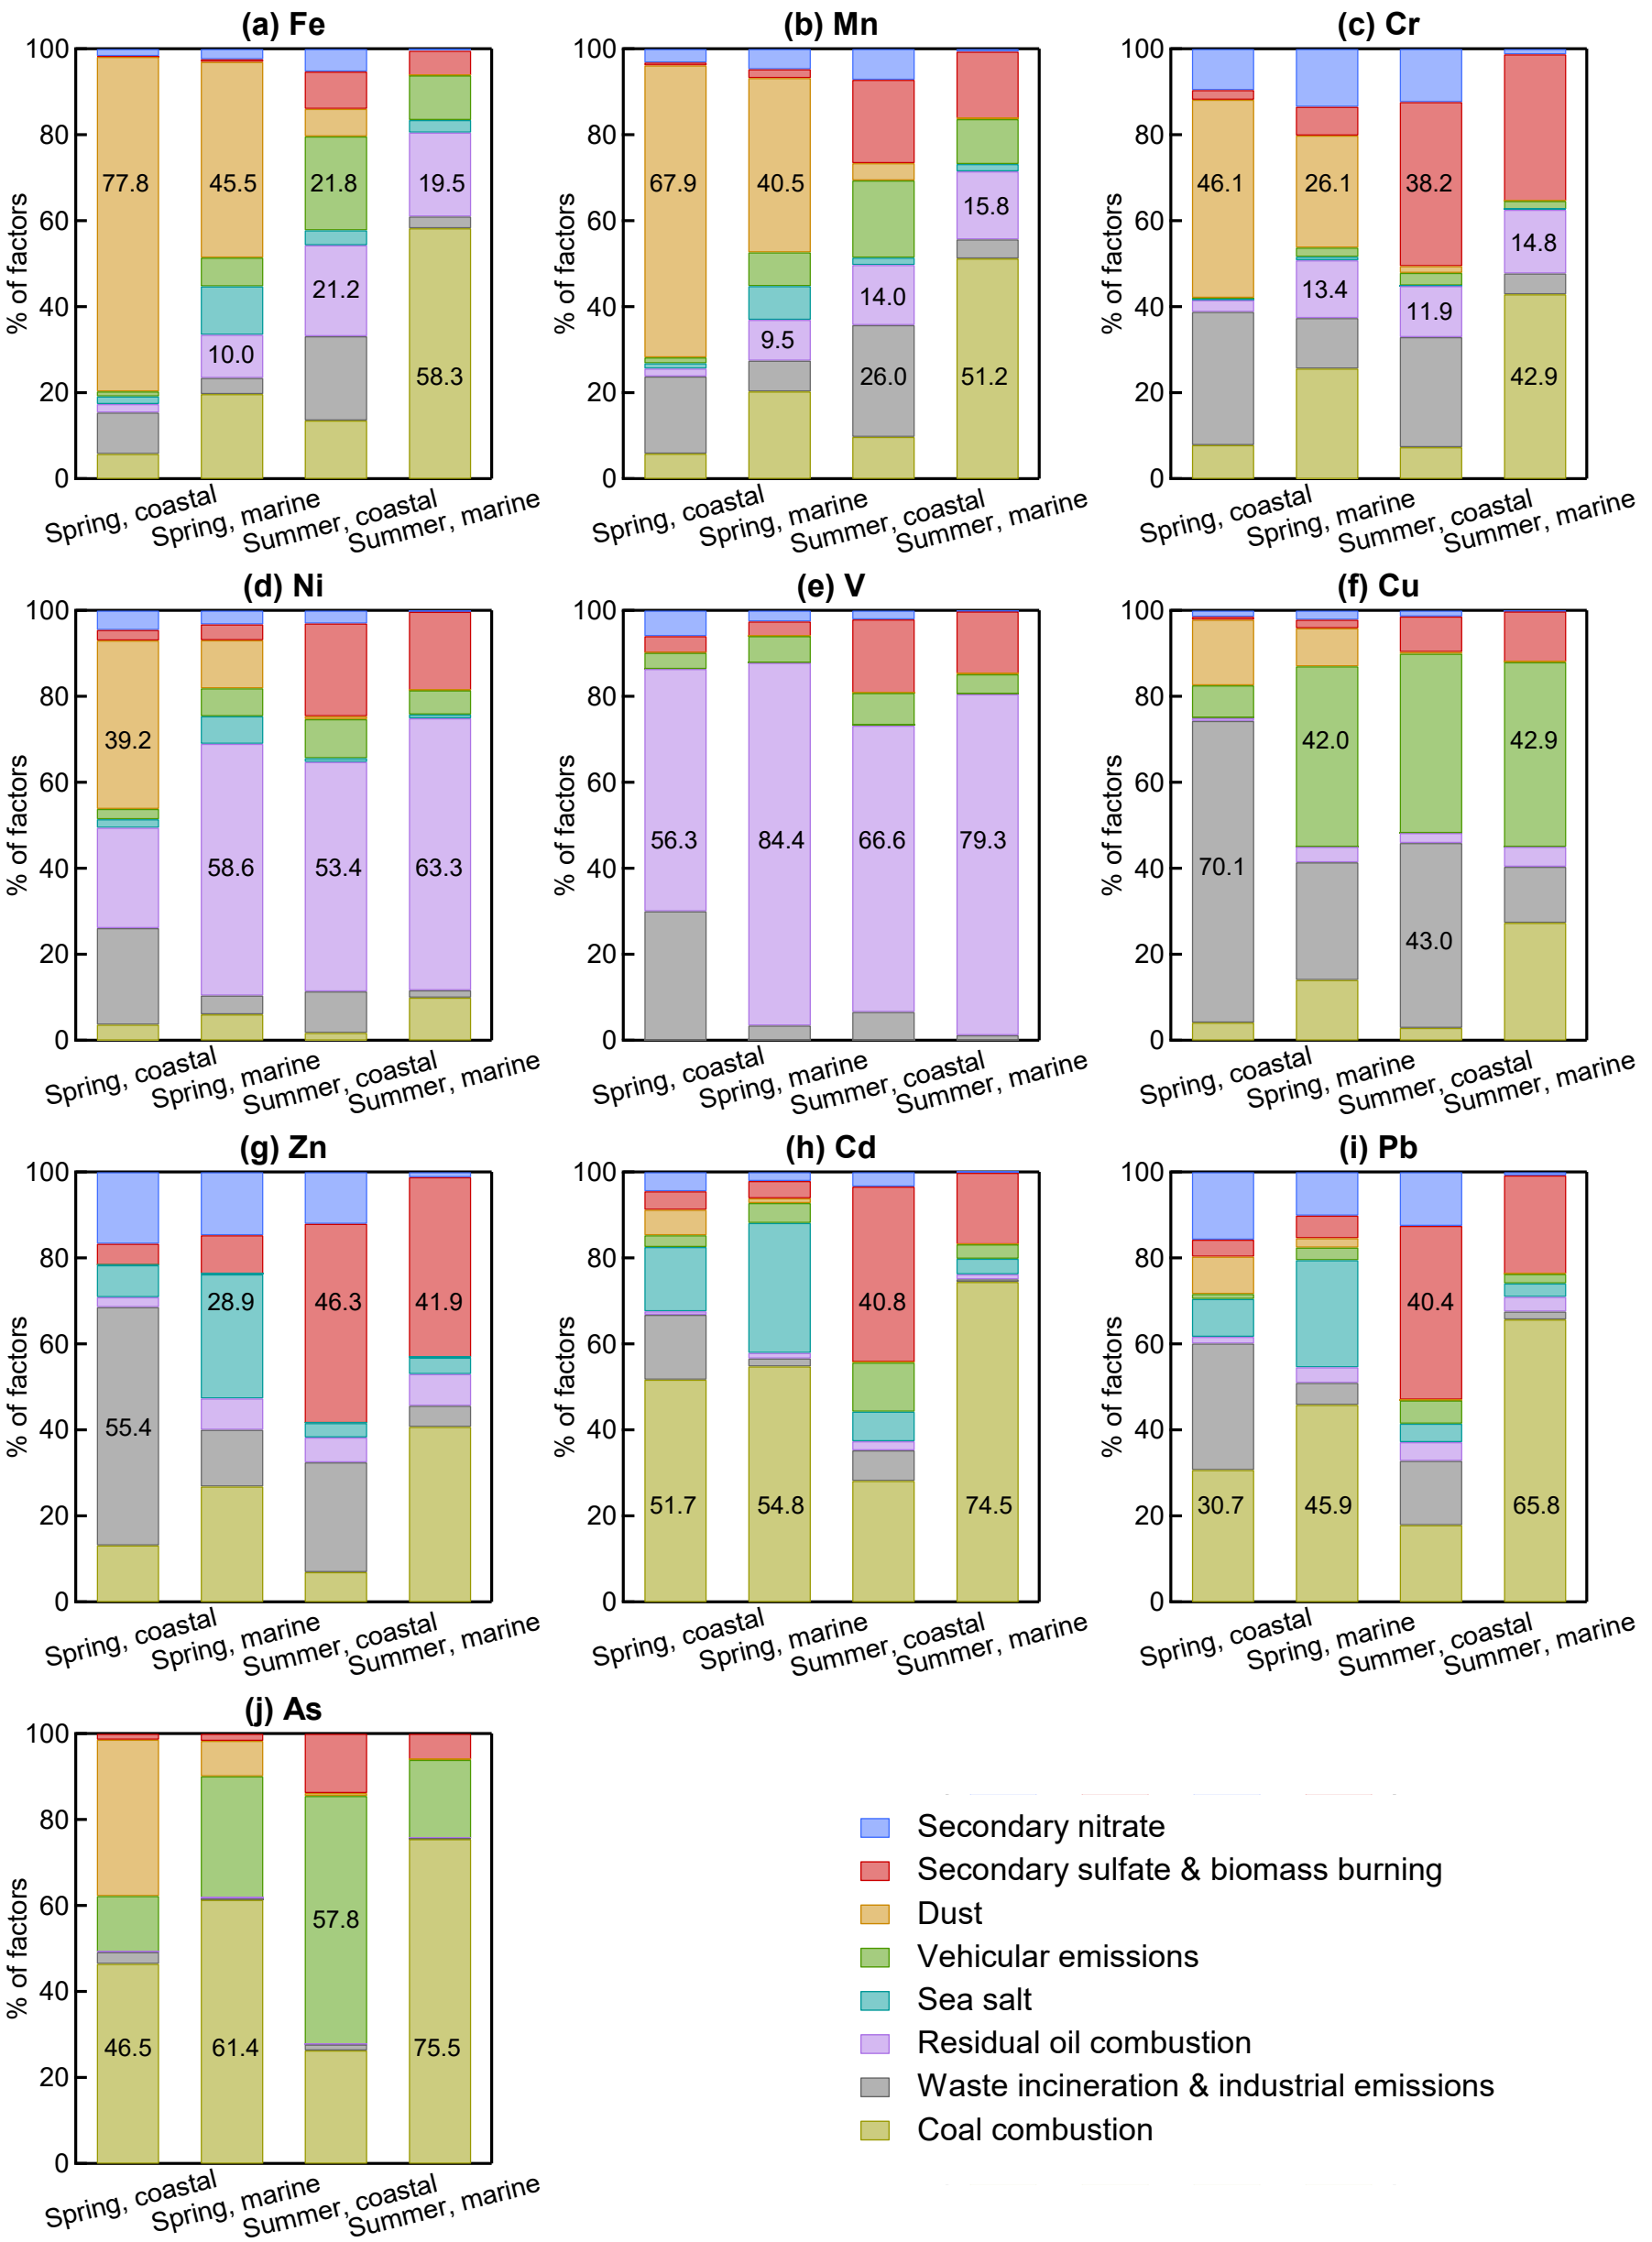

Supplement: Supplementary file 9 [file egusphere-2025-4005-supplement.zip]

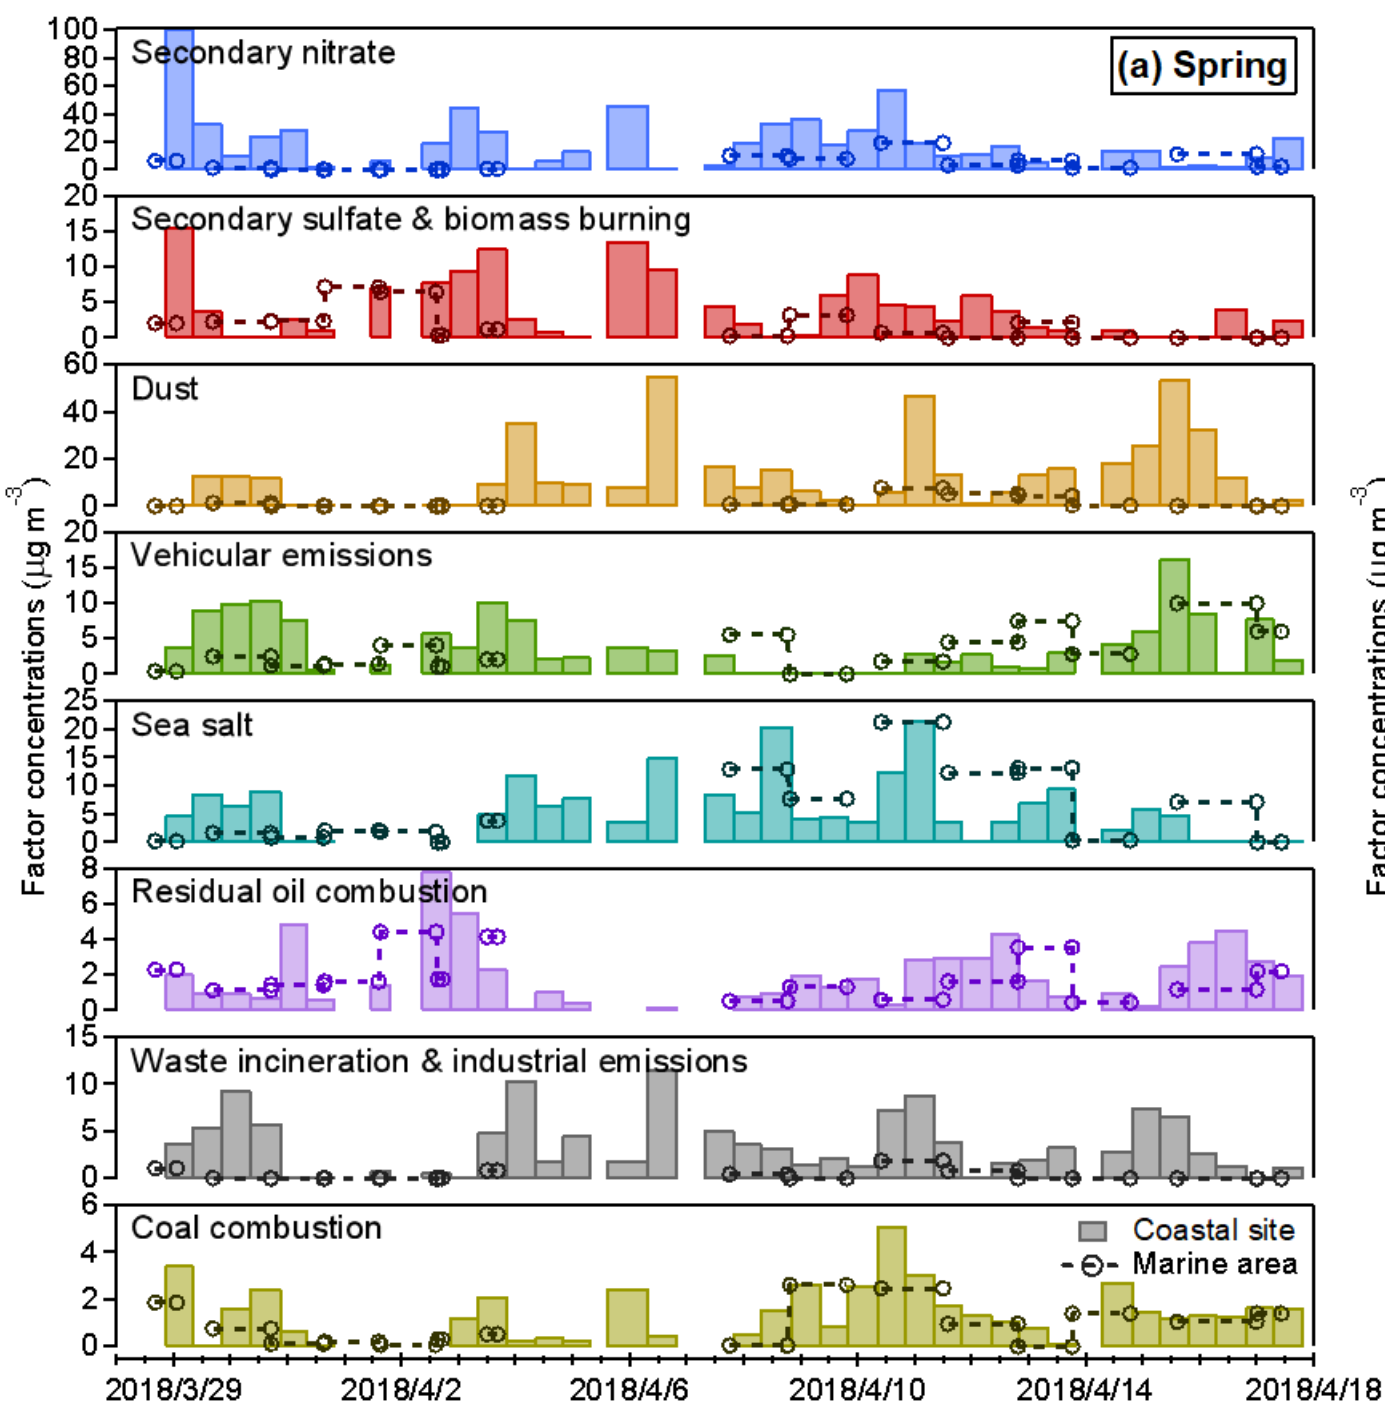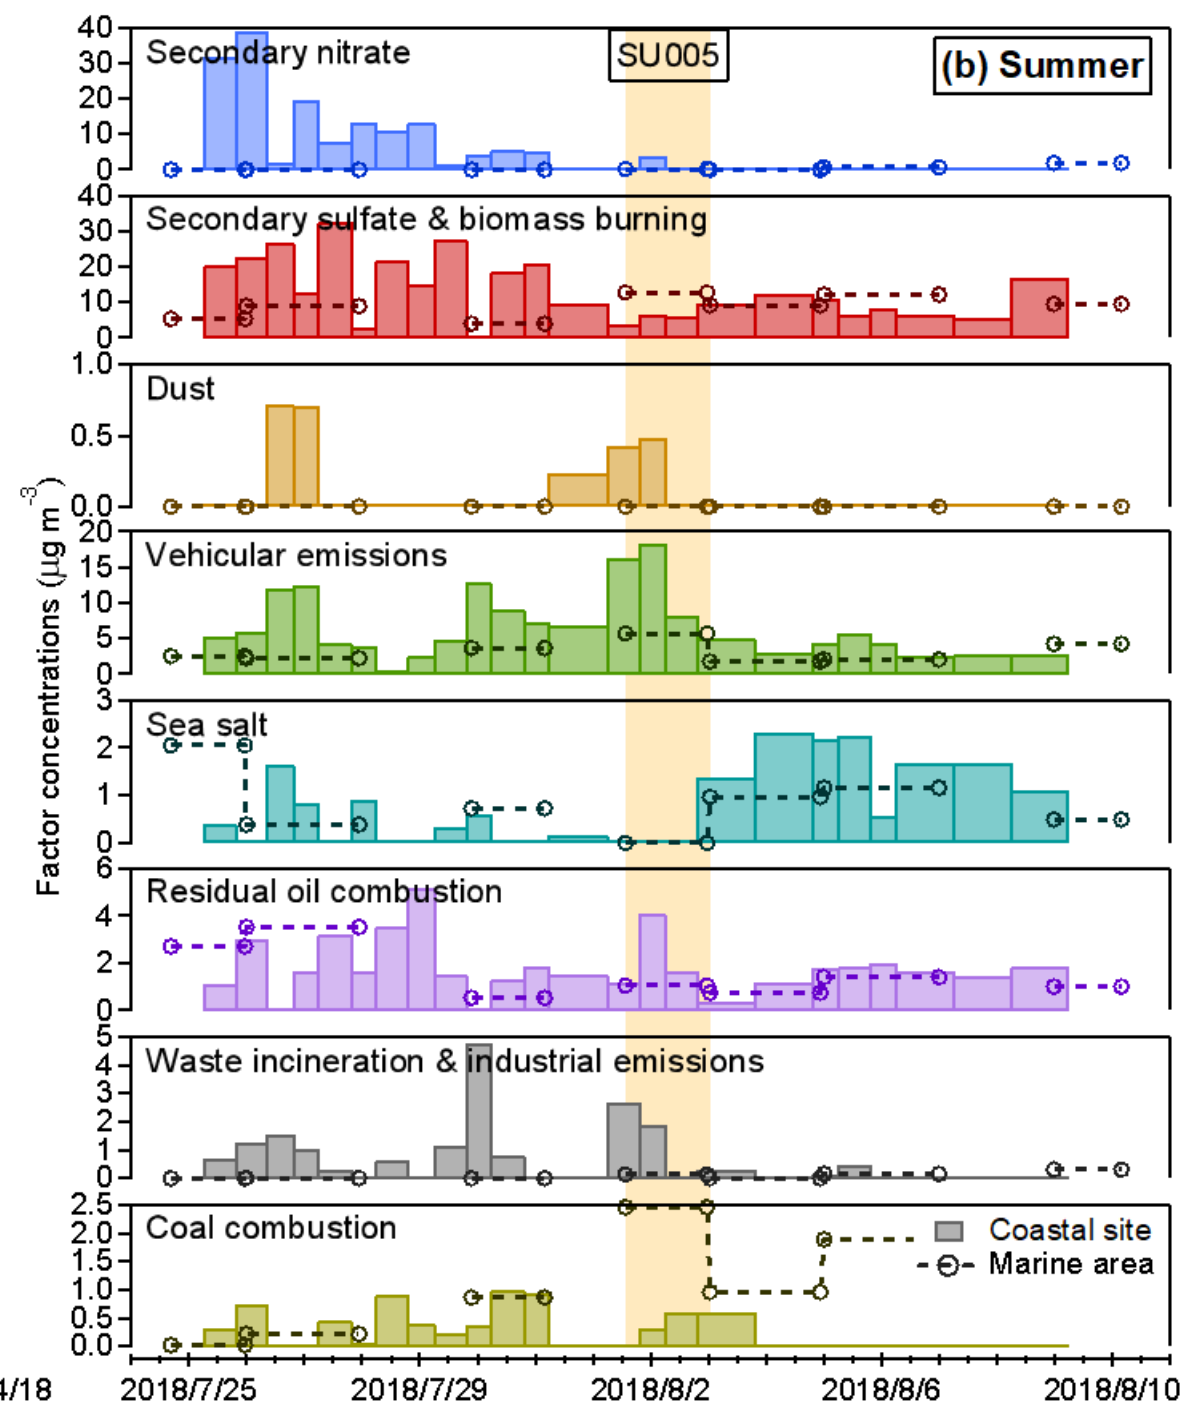

Supplement: Supplementary file 10 [file egusphere-2025-4005-supplement.zip]

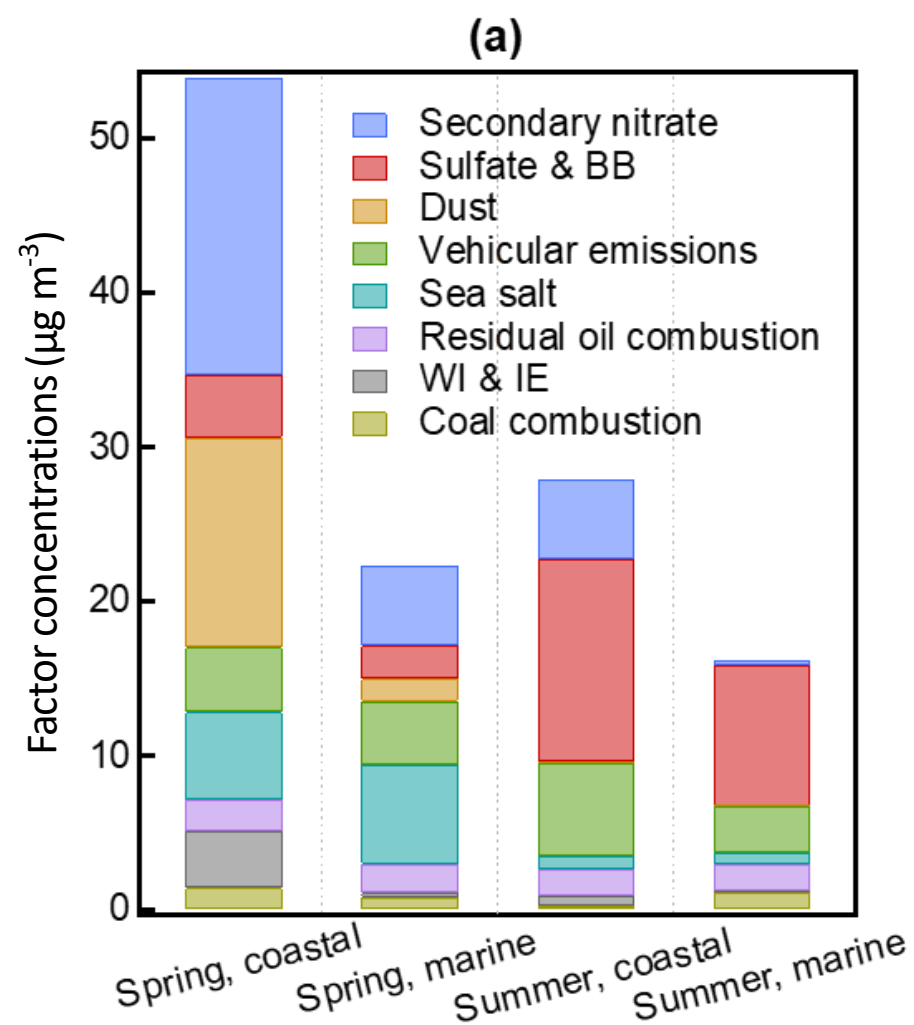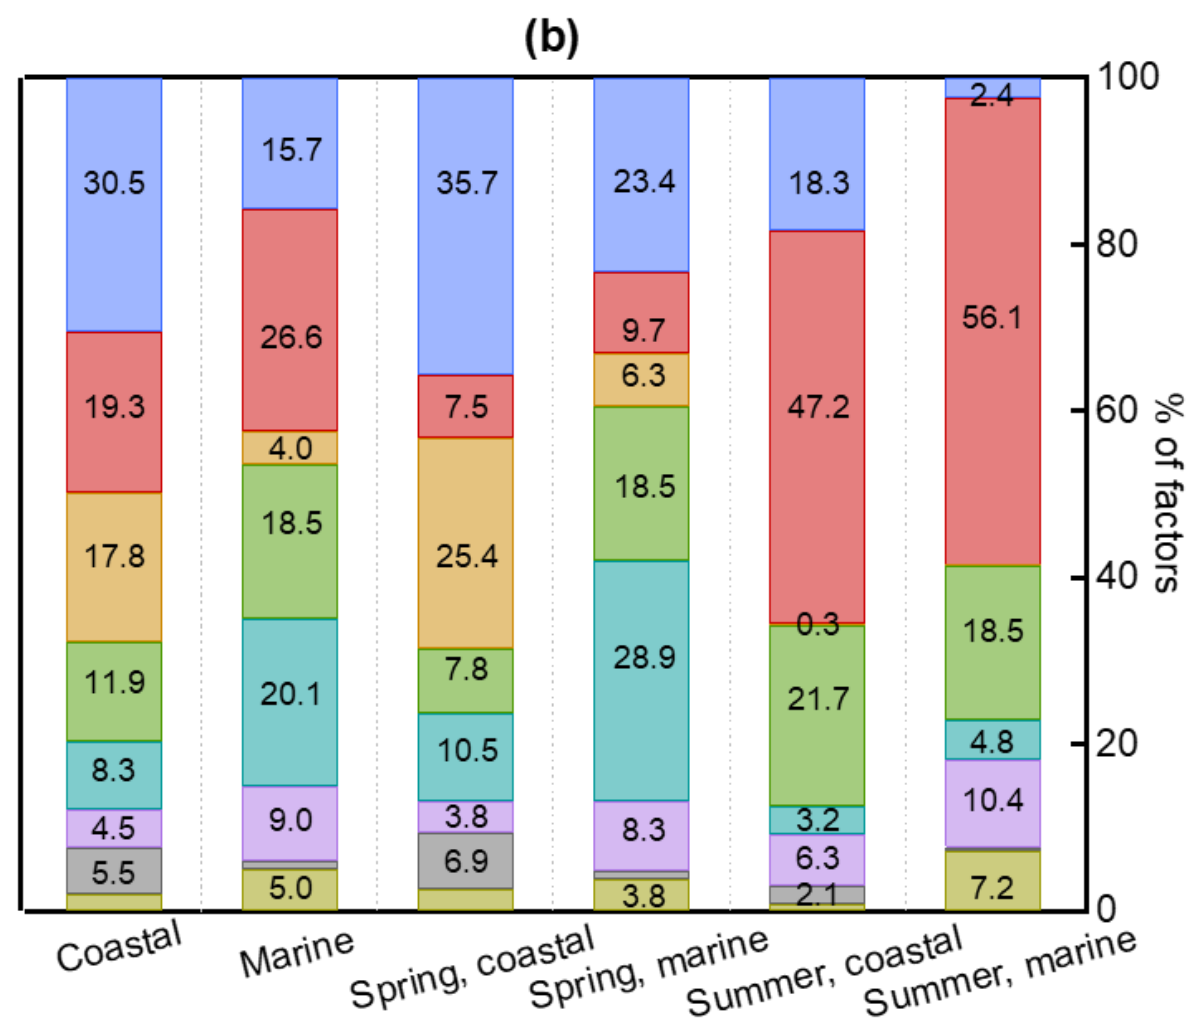

Supplement: Supplementary file 11 [file egusphere-2025-4005-supplement.zip]

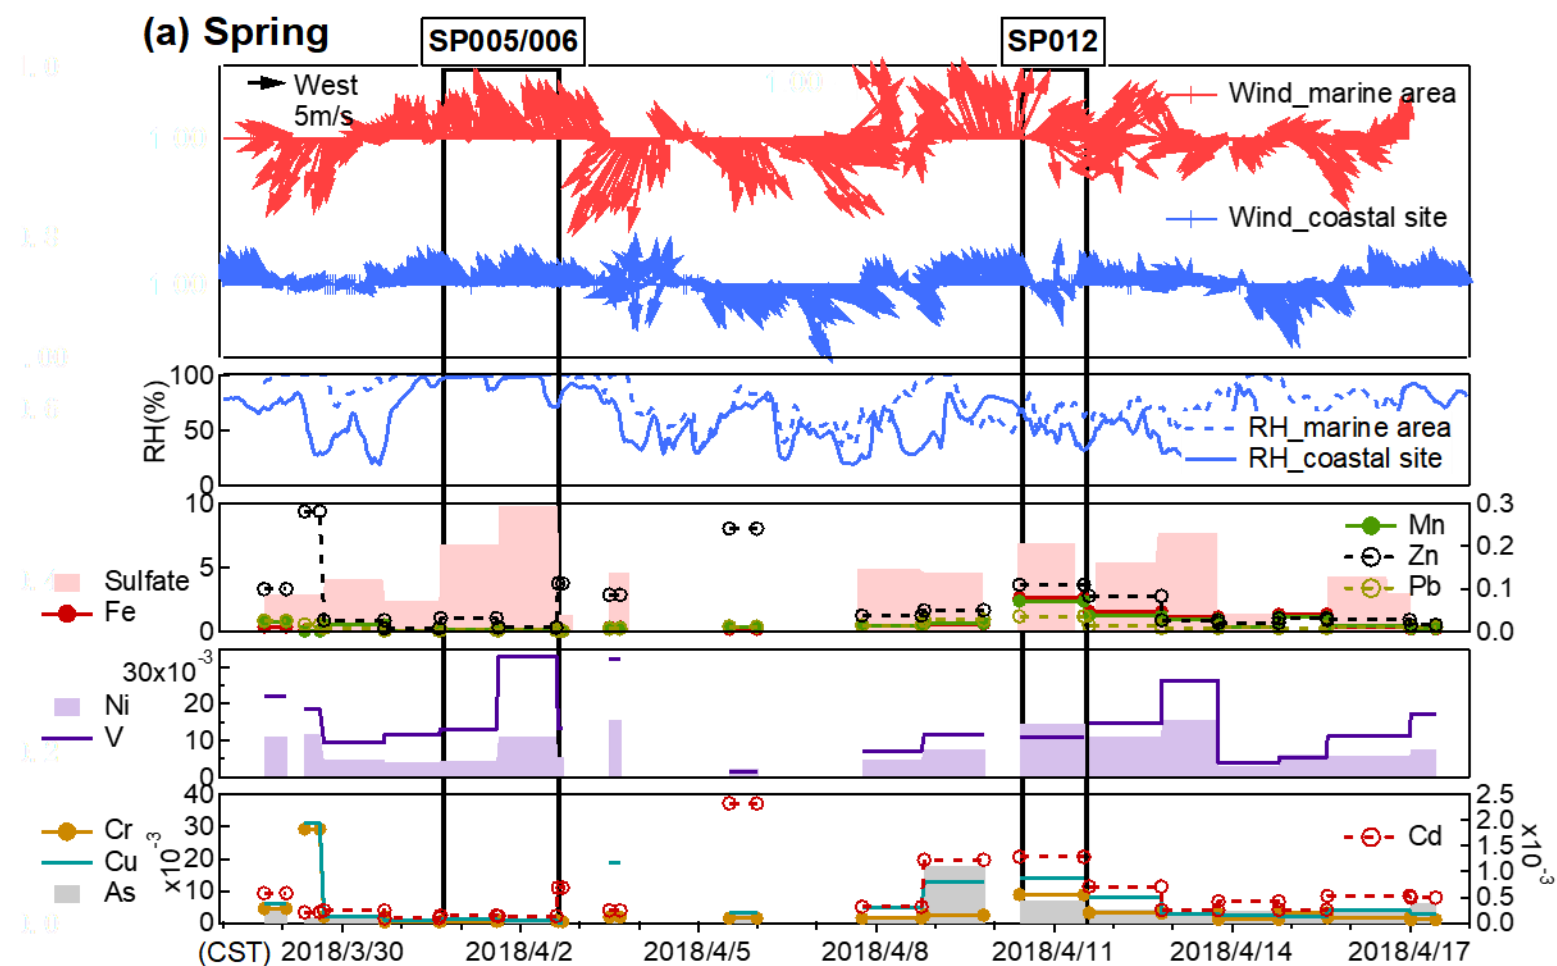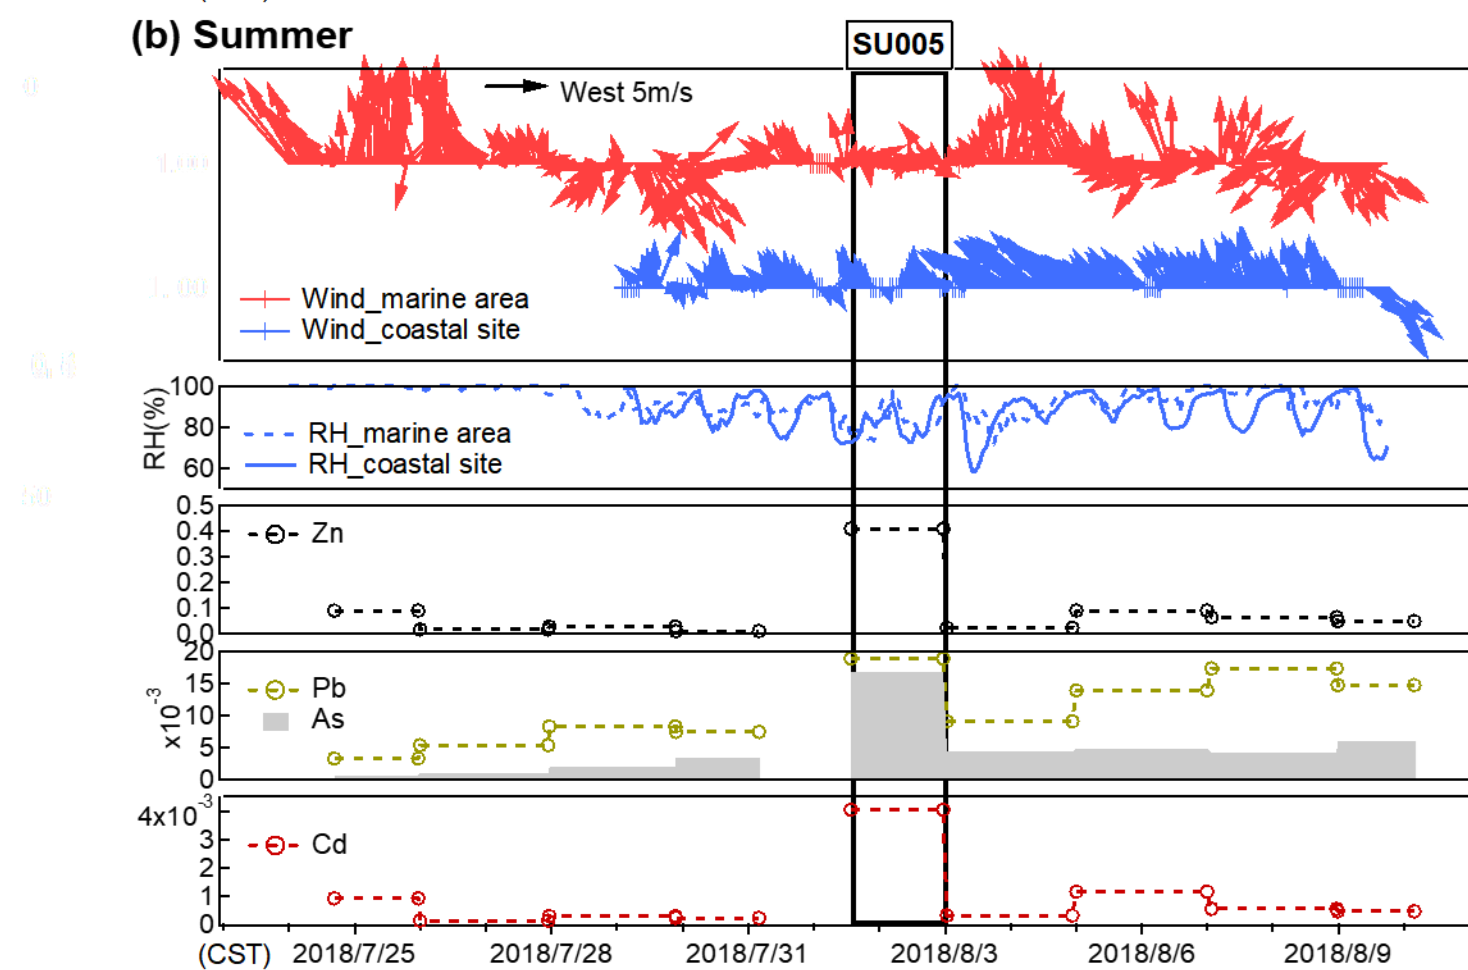

Supplement: Supplementary file 12 [file egusphere-2025-4005-supplement.zip]
